# Supplementary material for: Solvent-free synthesis and in-silico molecular docking study of (E)-3-(β-C-glycosylmethylidene)-N-aryl/alkyl succinimides
Source: Royal Society of Chemistry journal article supplement (doi:10.1039/d3ob01252b), 2023-01-01
Supplement: d3ob01252b1.pdf [file d3ob01252b1.pdf]

## Solvent free synthesis and *in-silico* molecular docking study of (*E*)-3-( $\beta$ -C-glycosylmethylidene)-*N*-aryl/alkyl succinimides

Bhawani Shankar,<sup>\*a,b</sup> Tejveer Singh,<sup>c</sup> Banty Kumar,<sup>d</sup> Aditi Arora,<sup>b</sup> Sumit Kumar,<sup>b</sup> and Brajendra K. Singh<sup>b</sup>

<sup>a</sup>Department of Chemistry, Deshbandhu College, University of Delhi, Delhi-110019 (INDIA)

<sup>b</sup>Bioorganic Laboratory, Department of Chemistry, University of Delhi, Delhi-110007 (INDIA)

<sup>c</sup>Department of Zoology, Hansraj College, University of Delhi, Delhi-110007

<sup>d</sup>Department of Chemistry, Rajdhani College, University of Delhi, Delhi-110015 (INDIA)

### \*Corresponding Author

Bhawani Shankar, Deshbandhu College, Department of Chemistry, University of Delhi, Delhi-110019 (INDIA); orcid.org/0000-0001-7554-1256; Phone: 00-91-11-26439565. E-mail: bshankar@db.du.ac.in

### Table of Contents

| Details                                                               | Figure  | Page    |
|-----------------------------------------------------------------------|---------|---------|
| Table of Contents                                                     | -       | S1-S2   |
| <sup>1</sup> H and <sup>13</sup> C NMR spectra of compound <b>3a</b>  | S1-S2   | S3      |
| <sup>1</sup> H and <sup>13</sup> C NMR spectra of compound <b>3b</b>  | S3-S4   | S4      |
| <sup>1</sup> H and <sup>13</sup> C NMR spectra of compound <b>3c</b>  | S5-S6   | S5      |
| <sup>1</sup> H and <sup>13</sup> C NMR spectra of compound <b>3d</b>  | S7-S8   | S6      |
| <sup>1</sup> H and <sup>13</sup> C NMR spectra of compound <b>3e</b>  | S9-S10  | S7      |
| <sup>1</sup> H- and <sup>13</sup> C NMR spectra of compound <b>3f</b> | S11-S12 | S8      |
| <sup>1</sup> H and <sup>13</sup> C NMR spectra of compound <b>3g</b>  | S13-S14 | S9      |
| <sup>1</sup> H and <sup>13</sup> C NMR spectra of compound <b>3h</b>  | S15-S16 | S10     |
| <sup>1</sup> H and <sup>13</sup> C NMR spectra of compound <b>3i</b>  | S17-S18 | S11     |
| <sup>1</sup> H and <sup>13</sup> C NMR spectra of compound <b>3j</b>  | S19-S20 | S12     |
| <sup>1</sup> H and <sup>13</sup> C NMR spectra of compound <b>3k</b>  | S21-S22 | S13     |
| <sup>1</sup> H and <sup>13</sup> C NMR spectra of compound <b>3l</b>  | S23-S24 | S14     |
| <sup>1</sup> H and <sup>13</sup> C NMR spectra of compound <b>3m</b>  | S25-S26 | S15     |
| <sup>1</sup> H and <sup>13</sup> C NMR spectra of compound <b>4a</b>  | S27-S29 | S16-S17 |
| <sup>1</sup> H and <sup>13</sup> C NMR spectra of compound <b>4b</b>  | S30-S31 | S18     |
| <sup>1</sup> H and <sup>13</sup> C NMR spectra of compound <b>4c</b>  | S32-S33 | S19     |
| <sup>1</sup> H and <sup>13</sup> C NMR spectra of compound <b>4d</b>  | S34-S35 | S20     |
| <sup>1</sup> H and <sup>13</sup> C NMR spectra of compound <b>4e</b>  | S36-S37 | S21     |
| <sup>1</sup> H and <sup>13</sup> C NMR spectra of compound <b>4f</b>  | S38-S39 | S22     |
| <sup>1</sup> H and <sup>13</sup> C NMR spectra of compound <b>4g</b>  | S40-S41 | S23     |

|                                                                      |          |         |
|----------------------------------------------------------------------|----------|---------|
| <sup>1</sup> H and <sup>13</sup> C NMR spectra of compound <b>4h</b> | S42-S43  | S24     |
| <sup>1</sup> H and <sup>13</sup> C NMR spectra of compound <b>4i</b> | S44-S45  | S25     |
| <sup>1</sup> H and <sup>13</sup> C NMR spectra of compound <b>4j</b> | S46-S47  | S26     |
| <sup>1</sup> H and <sup>13</sup> C NMR spectra of compound <b>4k</b> | S48-S49  | S27     |
| <sup>1</sup> H and <sup>13</sup> C NMR spectra of compound <b>4l</b> | S50-S51  | S28     |
| <sup>1</sup> H and <sup>13</sup> C NMR spectra of compound <b>4m</b> | S52-S53  | S29     |
| <sup>1</sup> H and <sup>13</sup> C NMR spectra of compound <b>5a</b> | S54-S55  | S30     |
| <sup>1</sup> H and <sup>13</sup> C NMR spectra of compound <b>1a</b> | S56-S57  | S31     |
| <sup>1</sup> H and <sup>13</sup> C NMR spectra of compound <b>1b</b> | S58-S59  | S32     |
| <sup>1</sup> H and <sup>13</sup> C NMR spectra of compound <b>1c</b> | S60-S61  | S33     |
| Single crystal data of compound <b>4k</b>                            | Table S1 | S34-S35 |
| <i>In-silico</i> molecular docking study data                        | Table S2 | S36-S37 |
| References                                                           | -        | S38     |

---

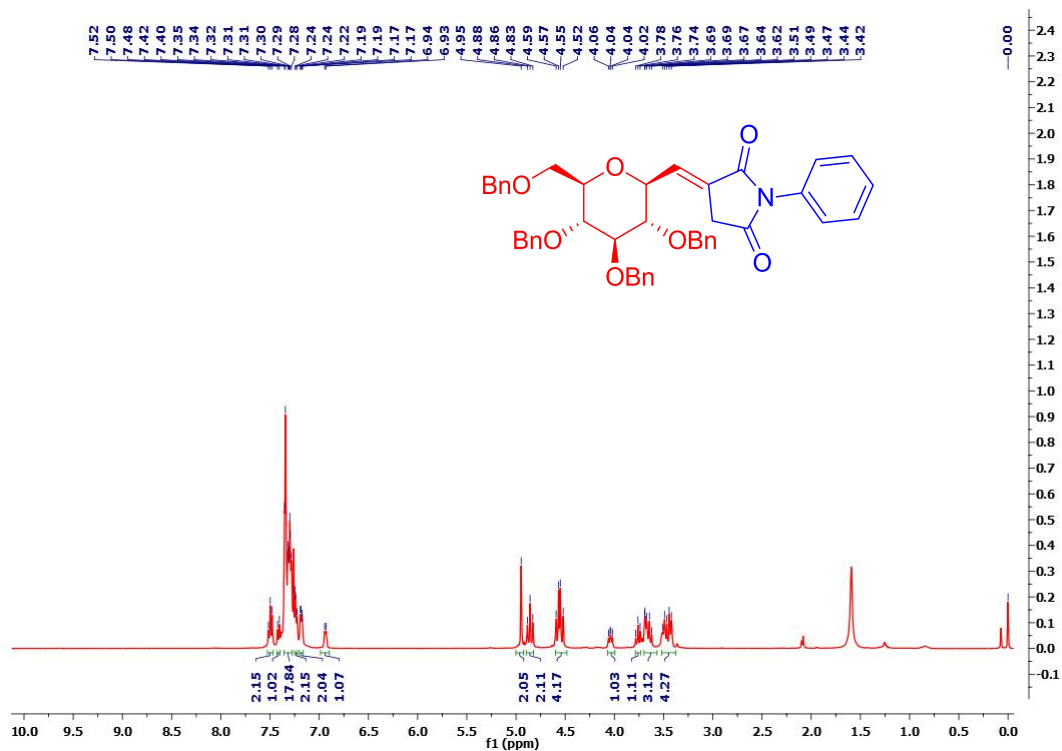

Figure S1.  $^1\text{H}$  NMR spectrum of compound **3a** (400 MHz,  $\text{CDCl}_3$ ).

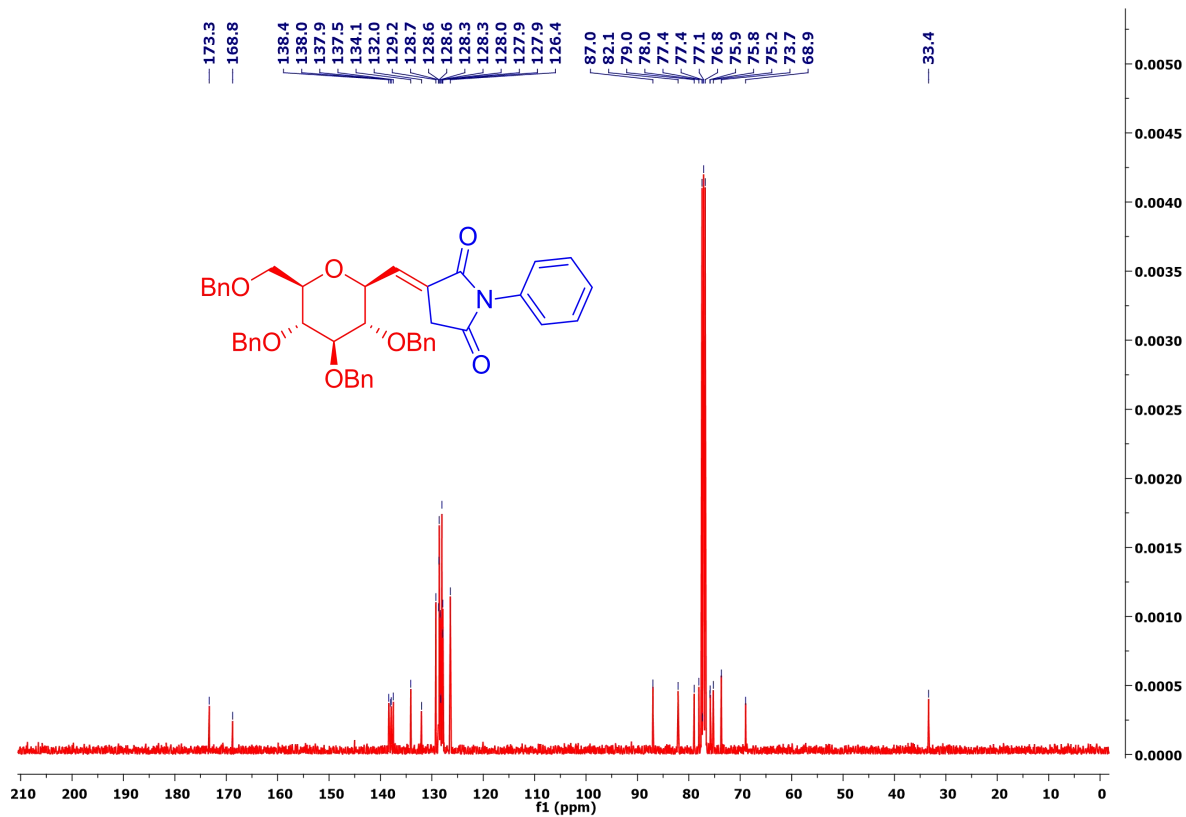

Figure S2.  $^{13}\text{C}$  NMR spectrum of compound **3a** (100.6 MHz,  $\text{CDCl}_3$ ).

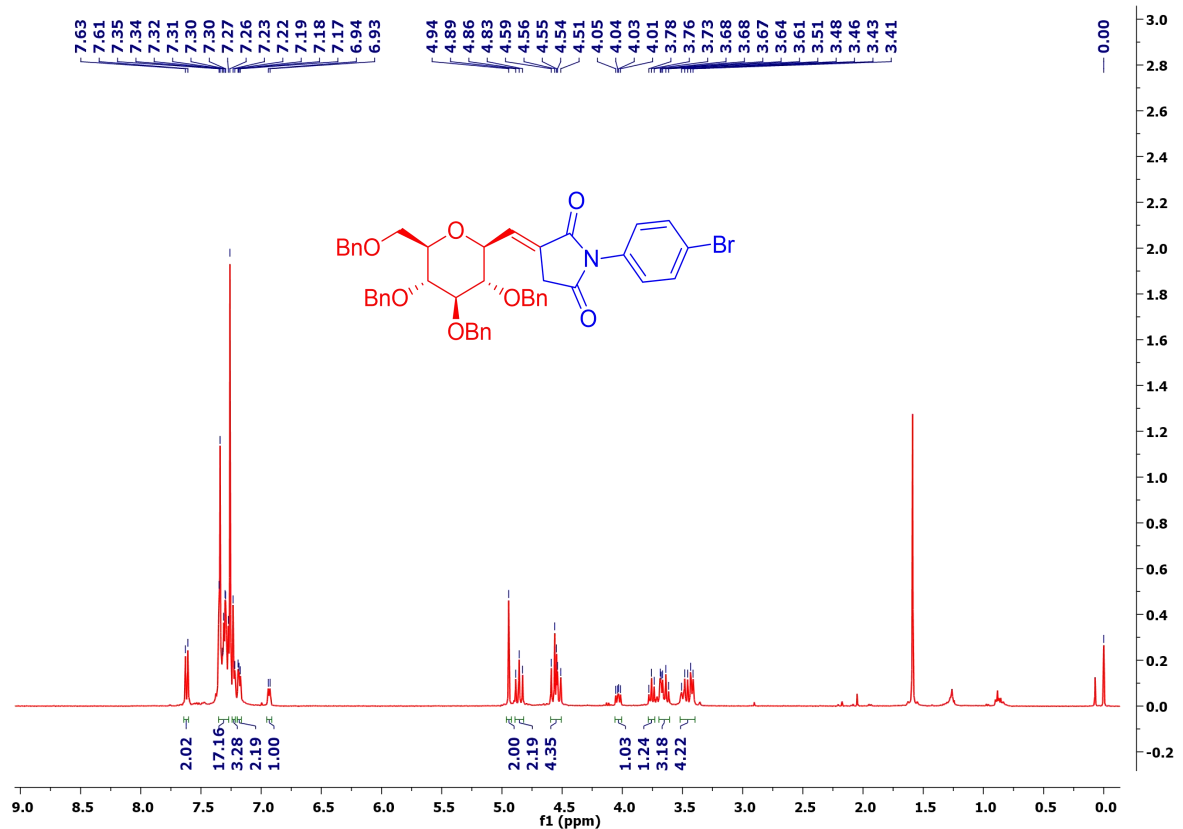

Figure S3. <sup>1</sup>H NMR spectrum of compound **3b** (400 MHz, CDCl<sub>3</sub>).

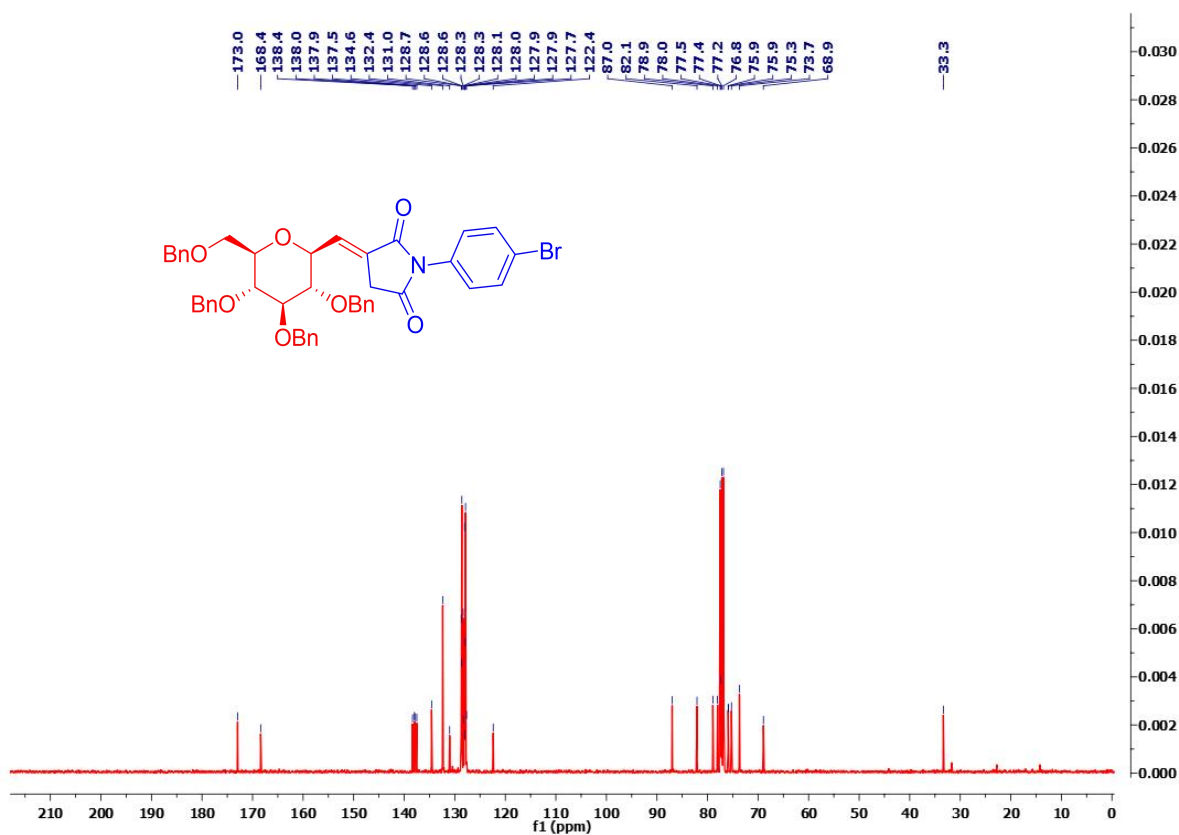

Figure S4. <sup>13</sup>C NMR spectrum of compound **3b** (100.6 MHz, CDCl<sub>3</sub>).



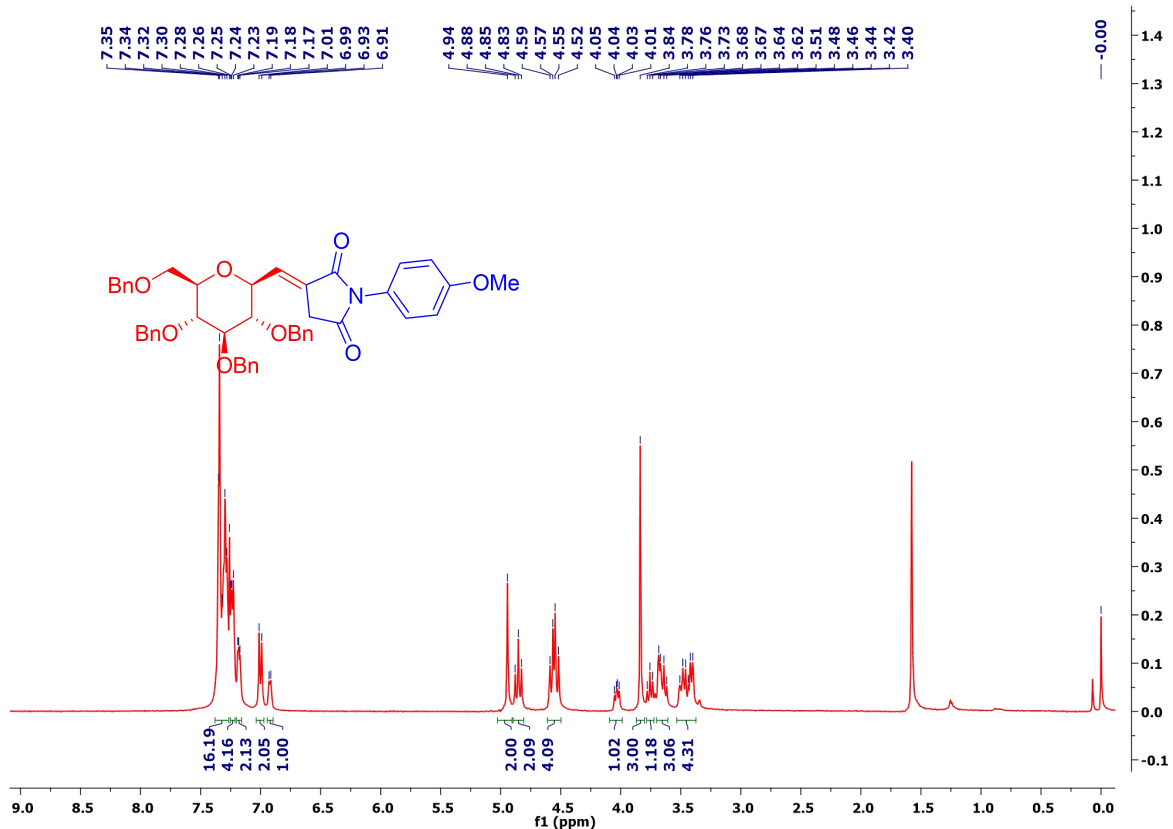

**Figure S5.**  $^1\text{H}$  NMR spectrum of compound **3c** (400 MHz,  $\text{CDCl}_3$ ).

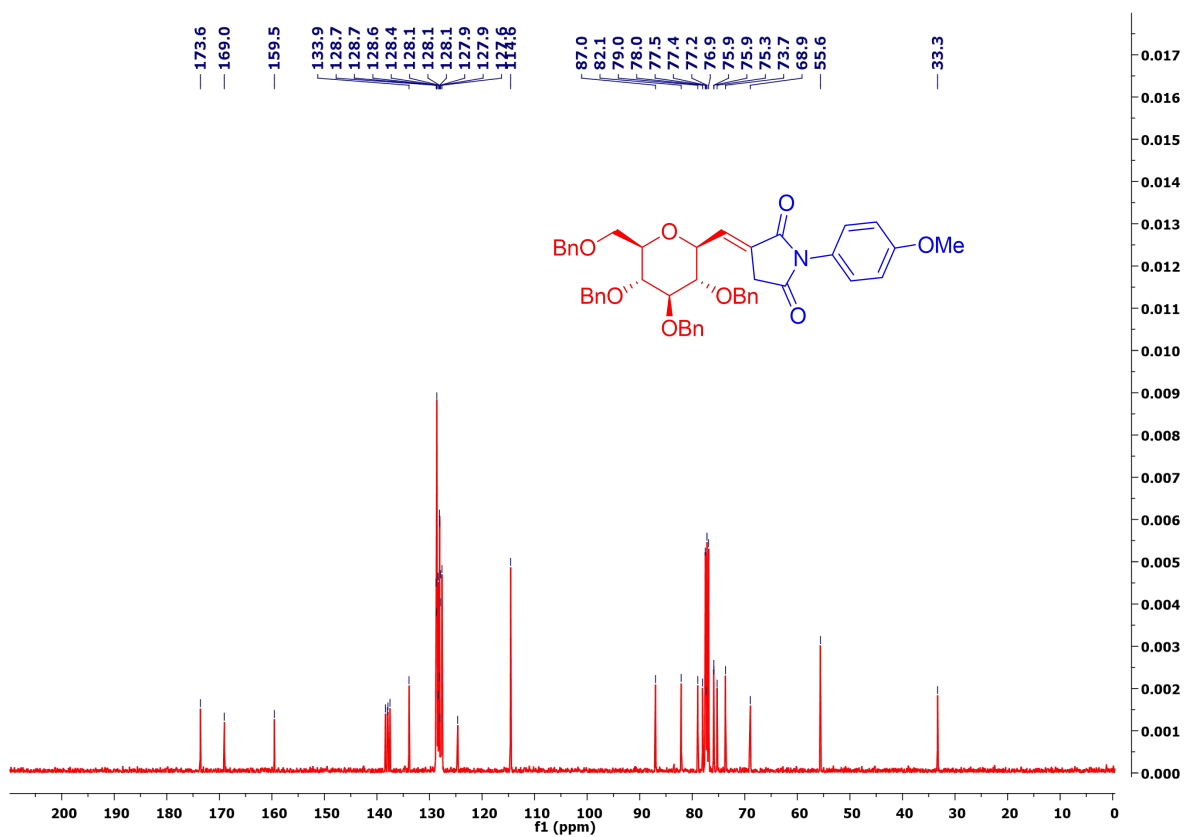

**Figure S6.**  $^{13}\text{C}$  NMR spectrum of compound **3c** (100.6 MHz,  $\text{CDCl}_3$ ).

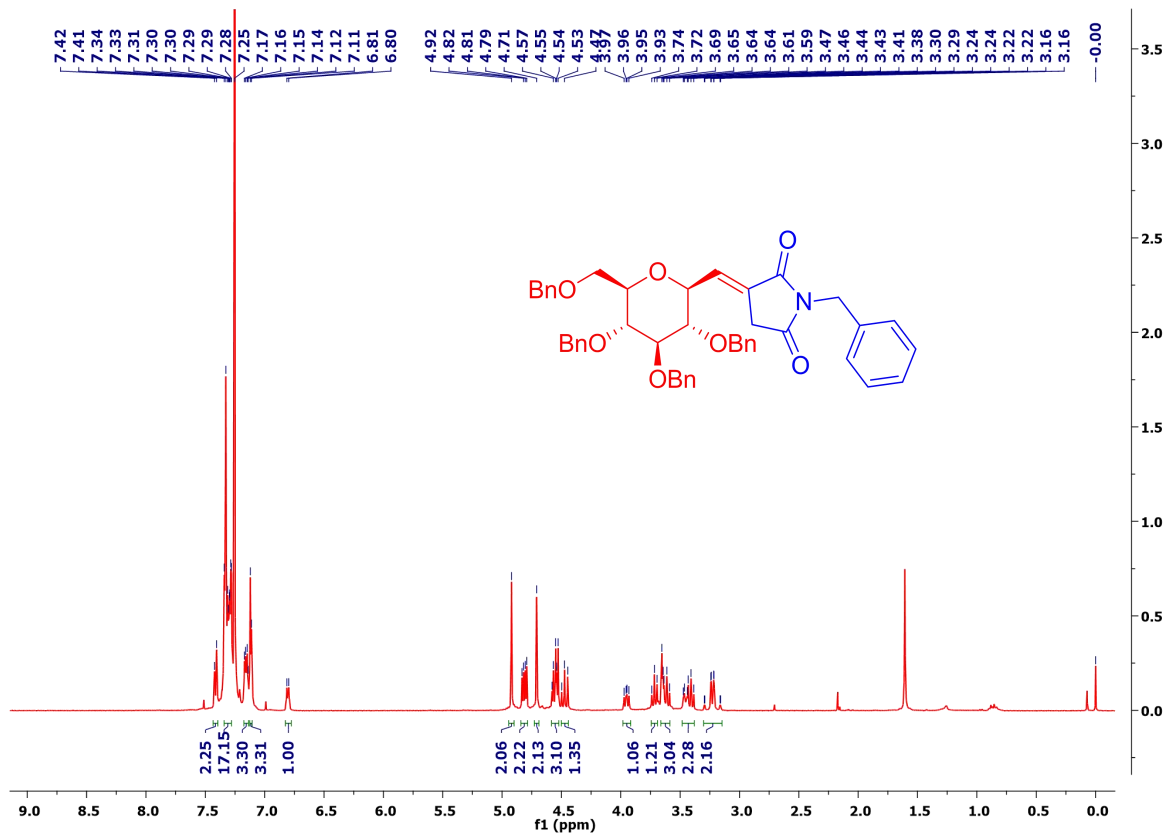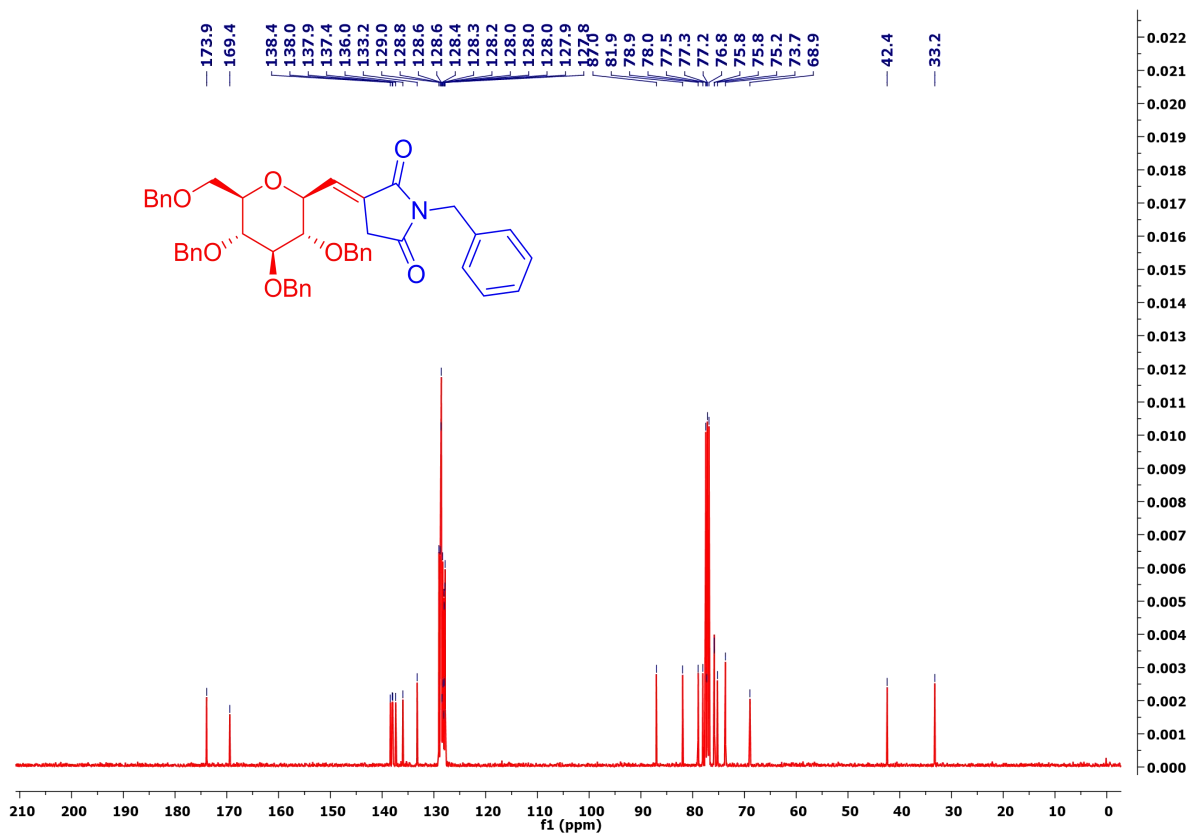

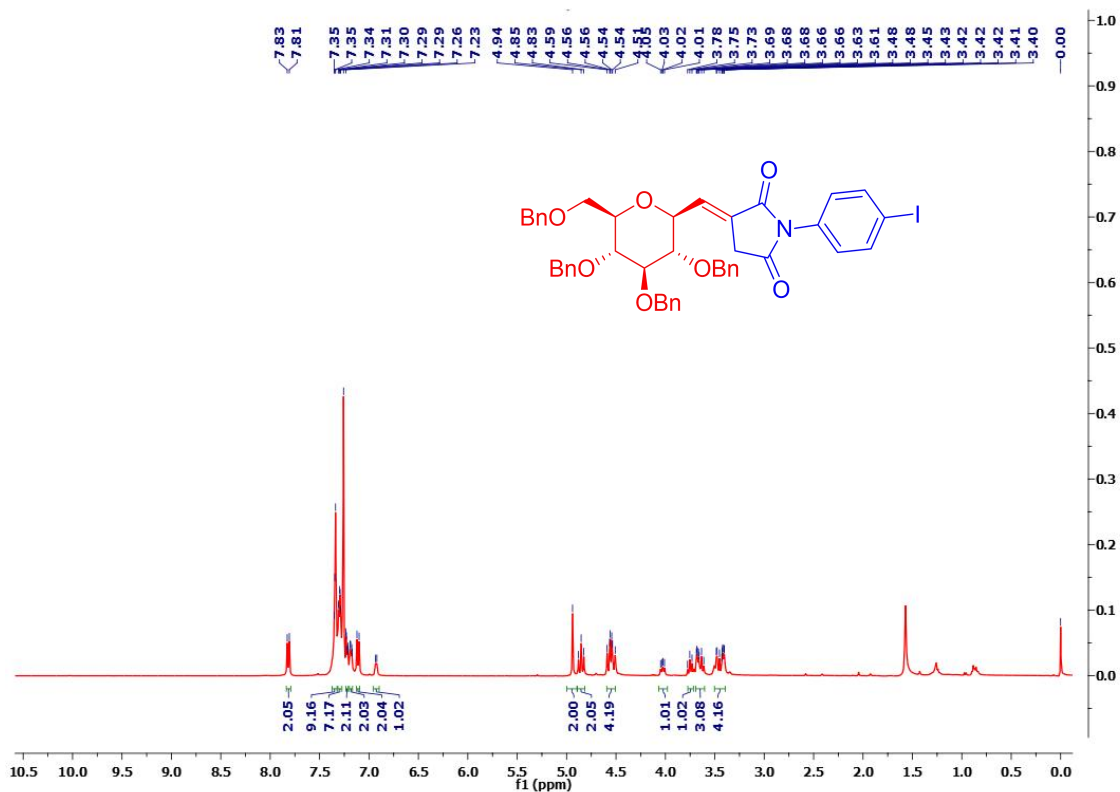

Figure S9.  $^1\text{H}$  NMR spectrum of compound 3e (400 MHz,  $\text{CDCl}_3$ ).

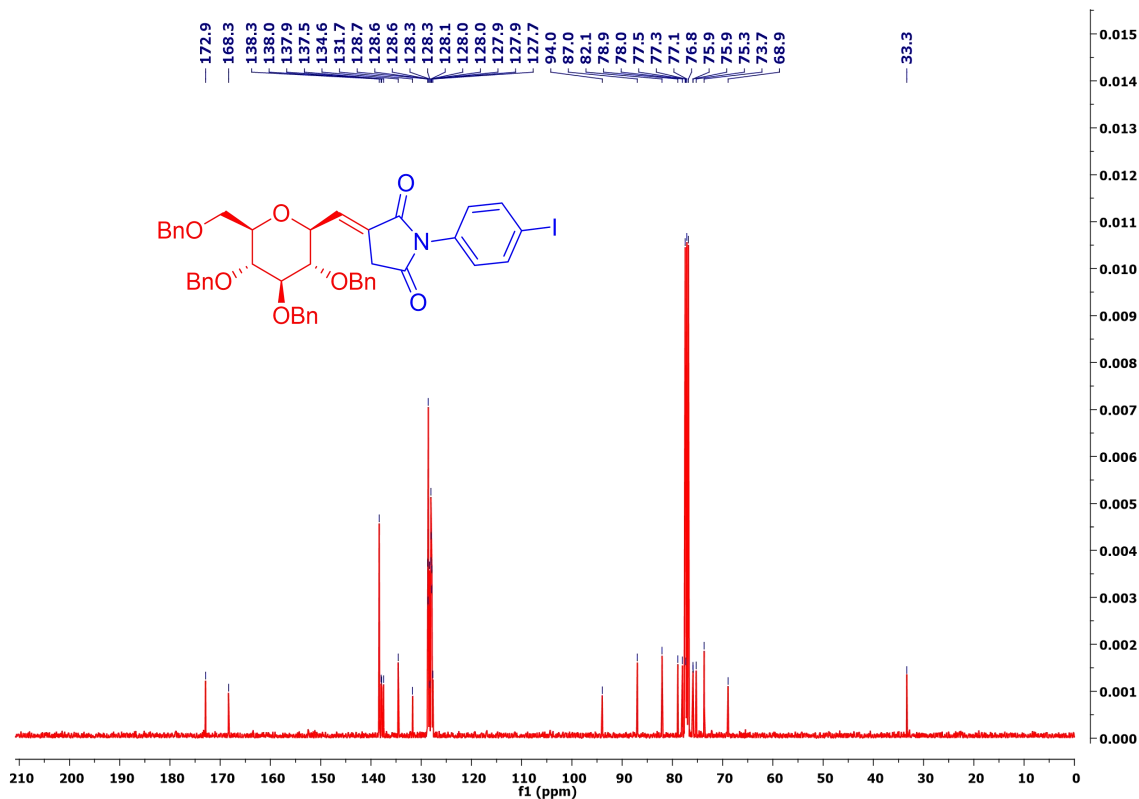

Figure S10.  $^{13}\text{C}$  NMR spectrum of compound 3e (100.6 MHz,  $\text{CDCl}_3$ ).

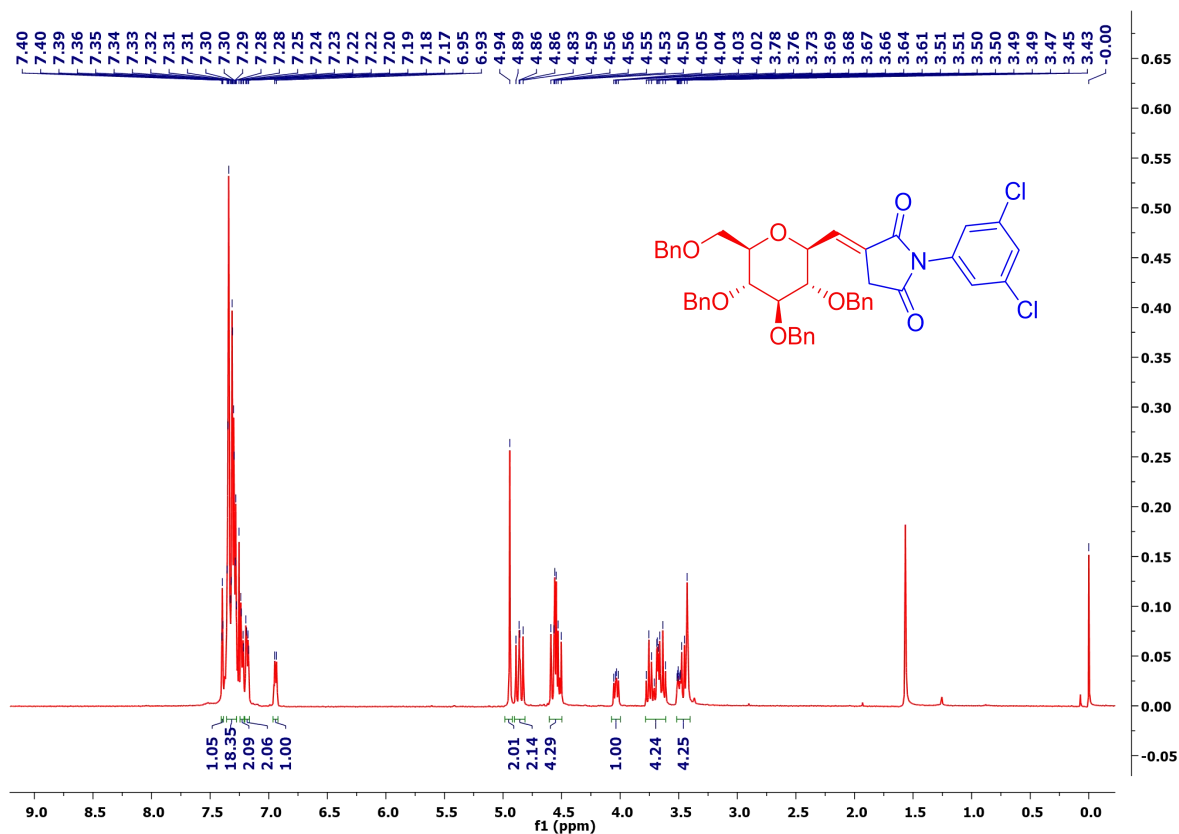

Figure S11.  $^1\text{H}$  NMR spectrum of compound **3f** (400 MHz,  $\text{CDCl}_3$ ).

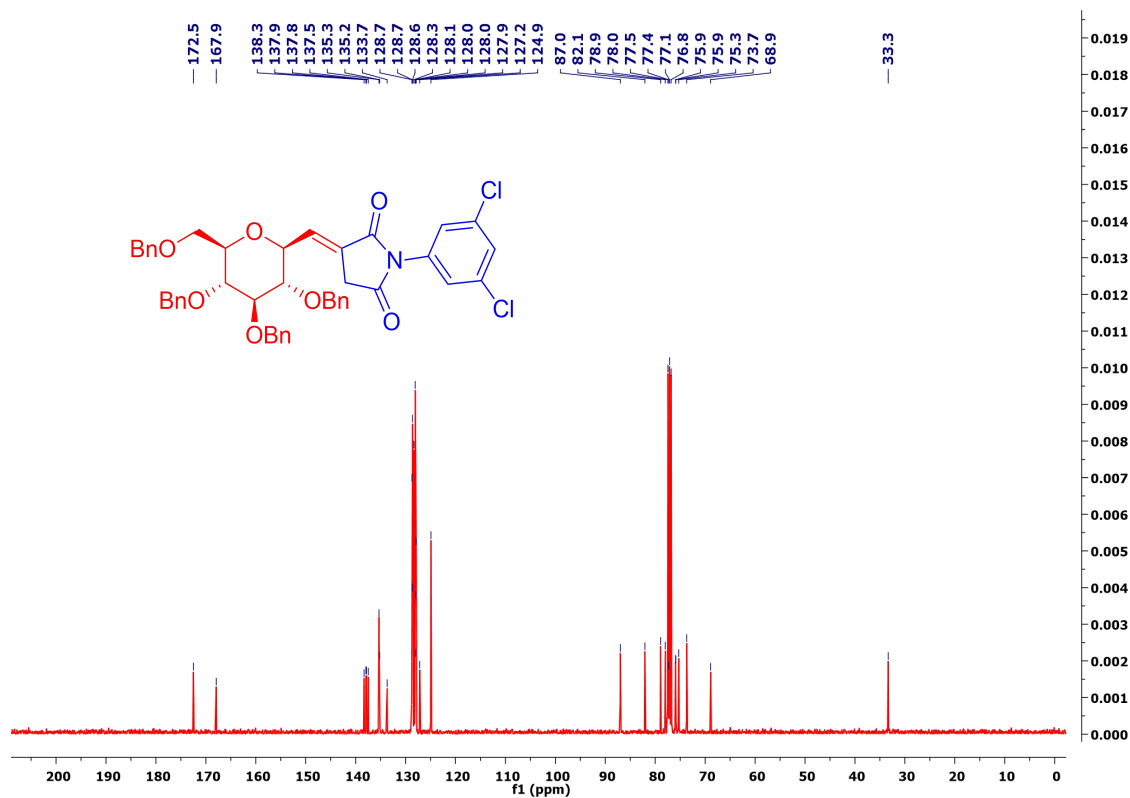

Figure S12.  $^{13}\text{C}$  NMR spectrum of compound **3f** (100.6 MHz,  $\text{CDCl}_3$ ).

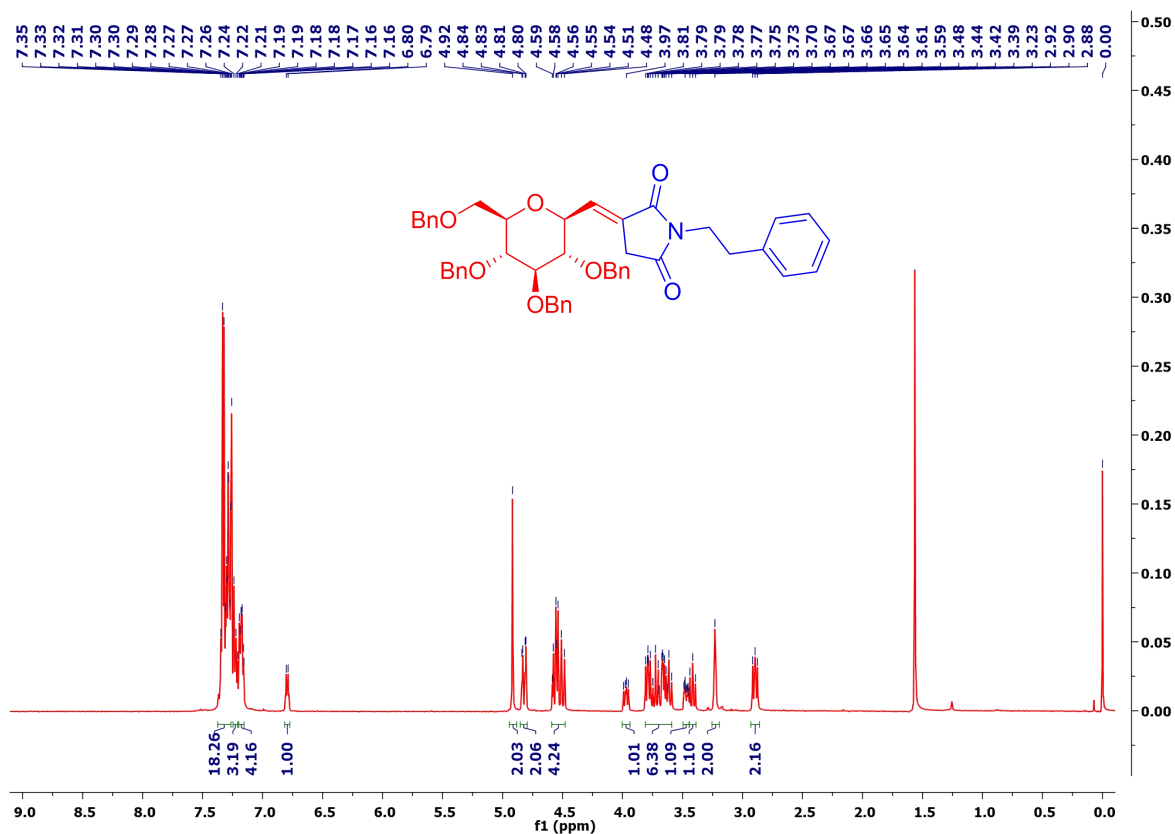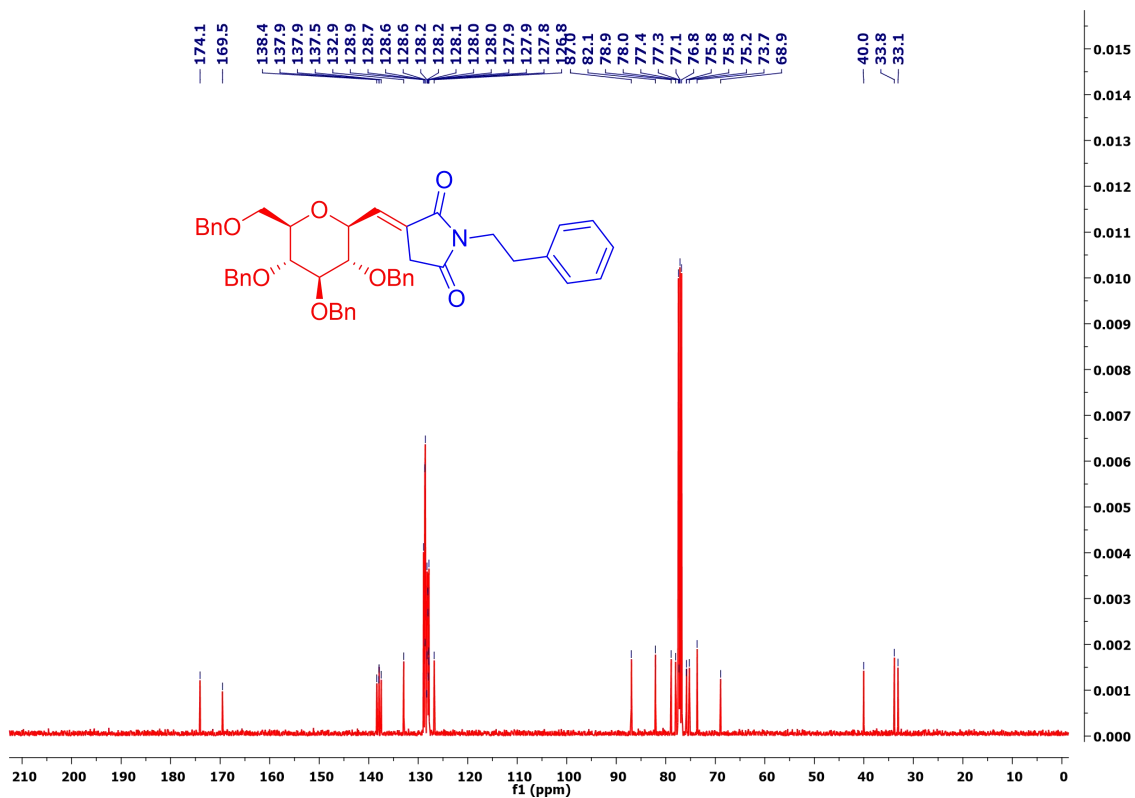

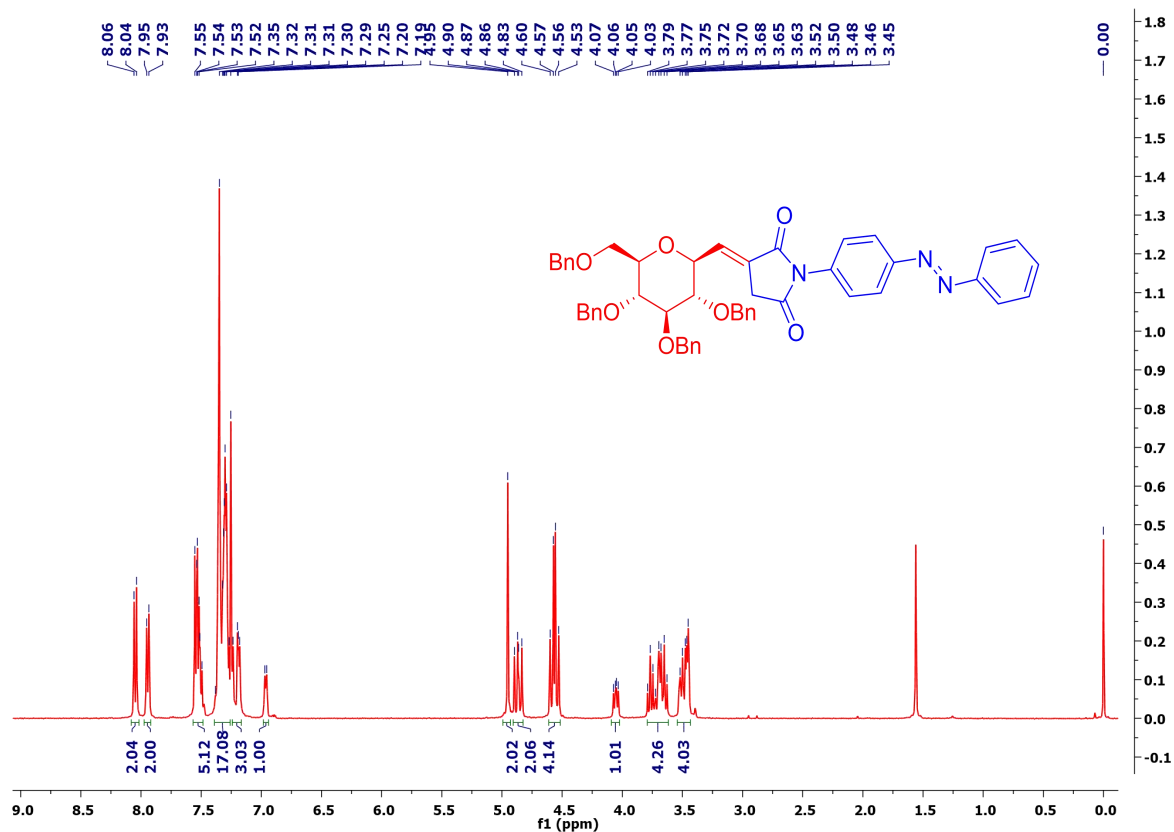

Figure S15.  $^1\text{H}$  NMR spectrum of compound **3h** (400 MHz,  $\text{CDCl}_3$ ).

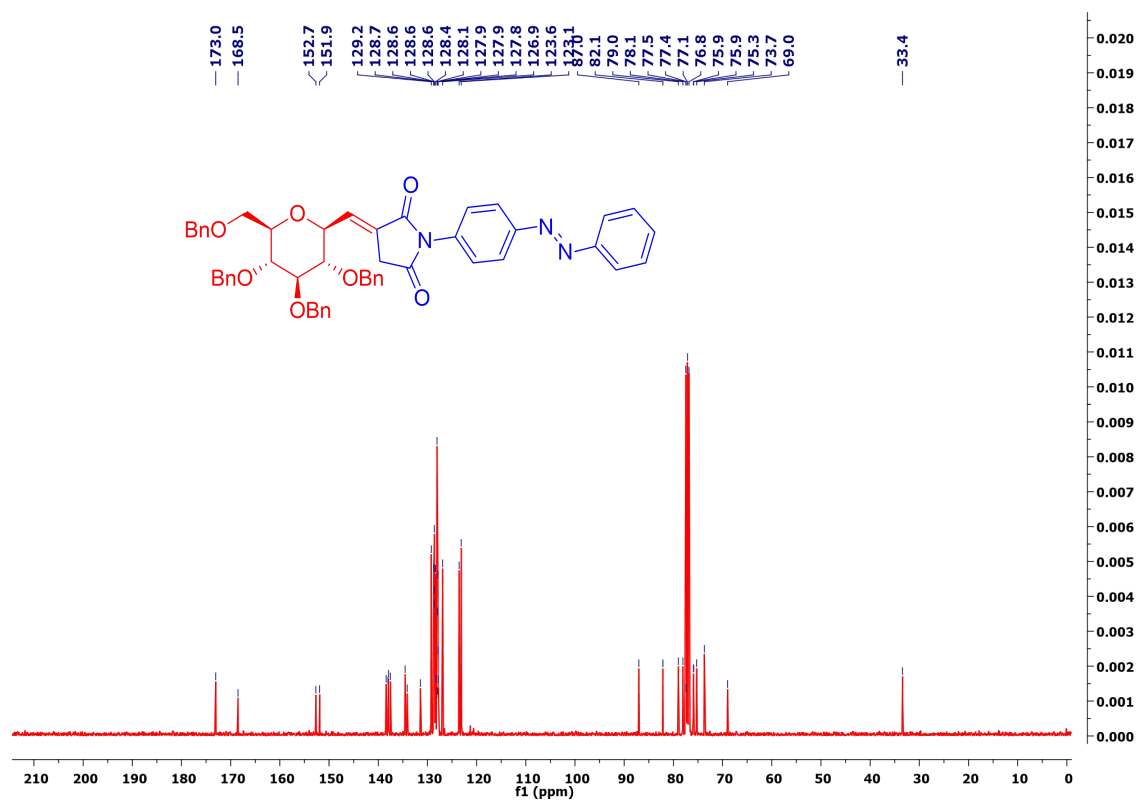

Figure S16.  $^{13}\text{C}$  NMR spectrum of compound **3h** (100.6 MHz,  $\text{CDCl}_3$ ).

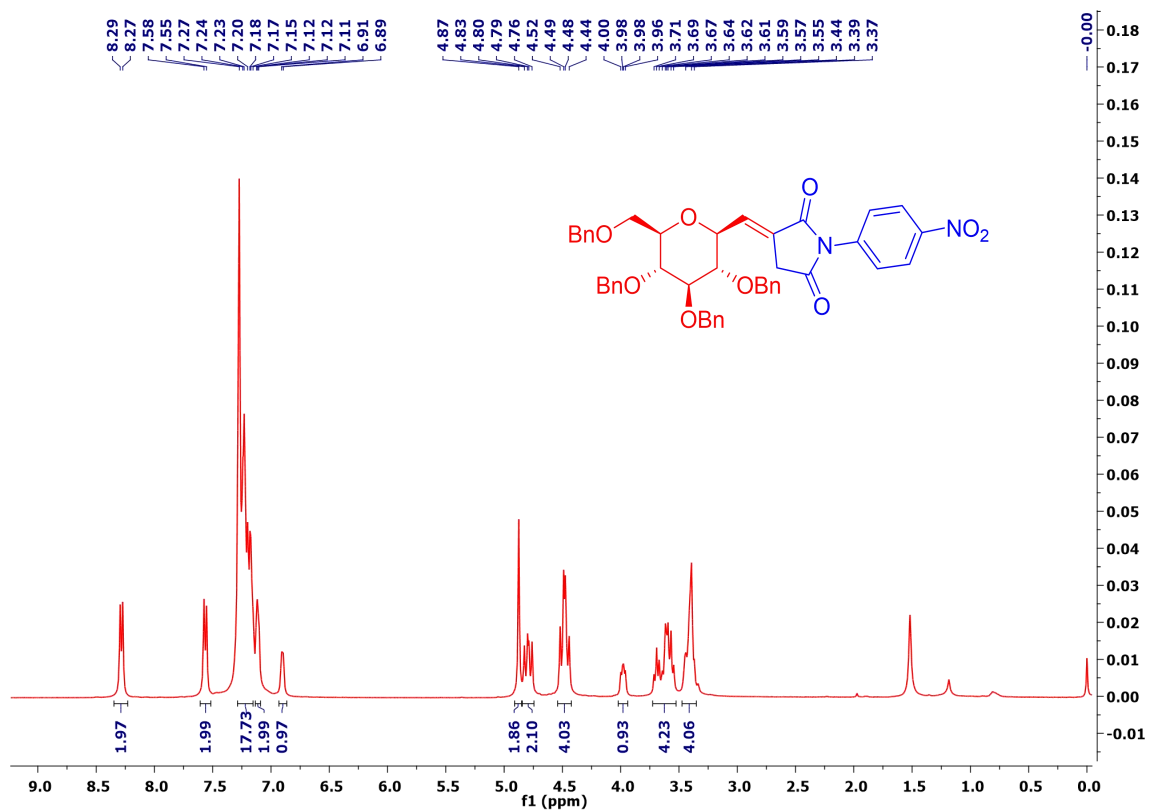

Figure S17.  $^1\text{H}$  NMR spectrum of compound **3i** (400 MHz,  $\text{CDCl}_3$ ).

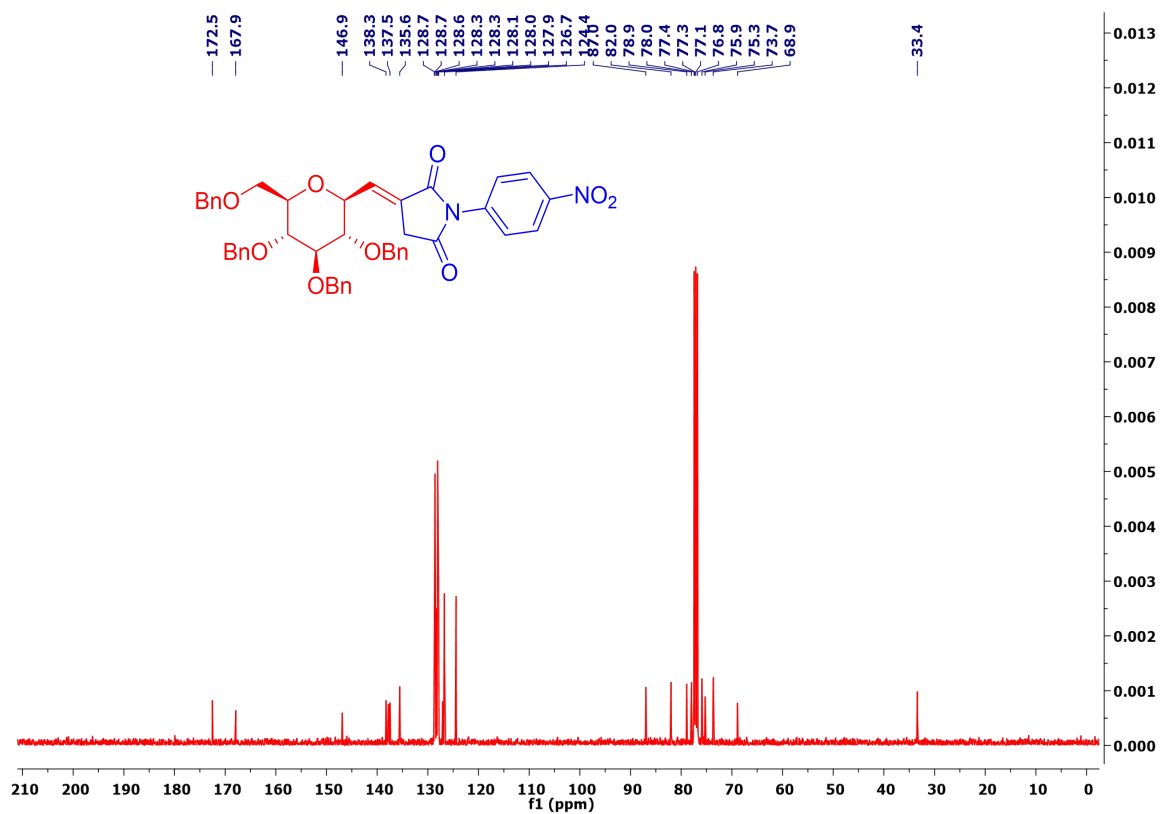

Figure S18.  $^{13}\text{C}$  NMR spectrum of compound **3i** (100.6 MHz,  $\text{CDCl}_3$ ).

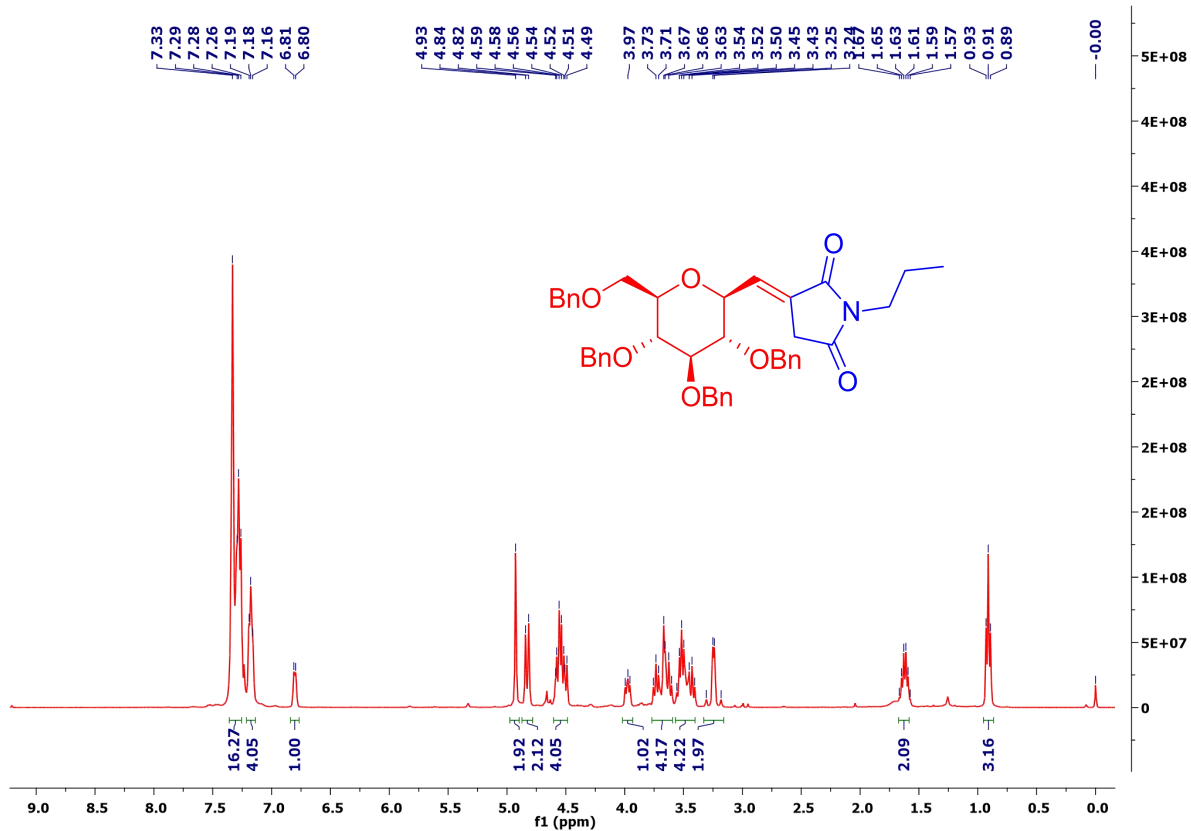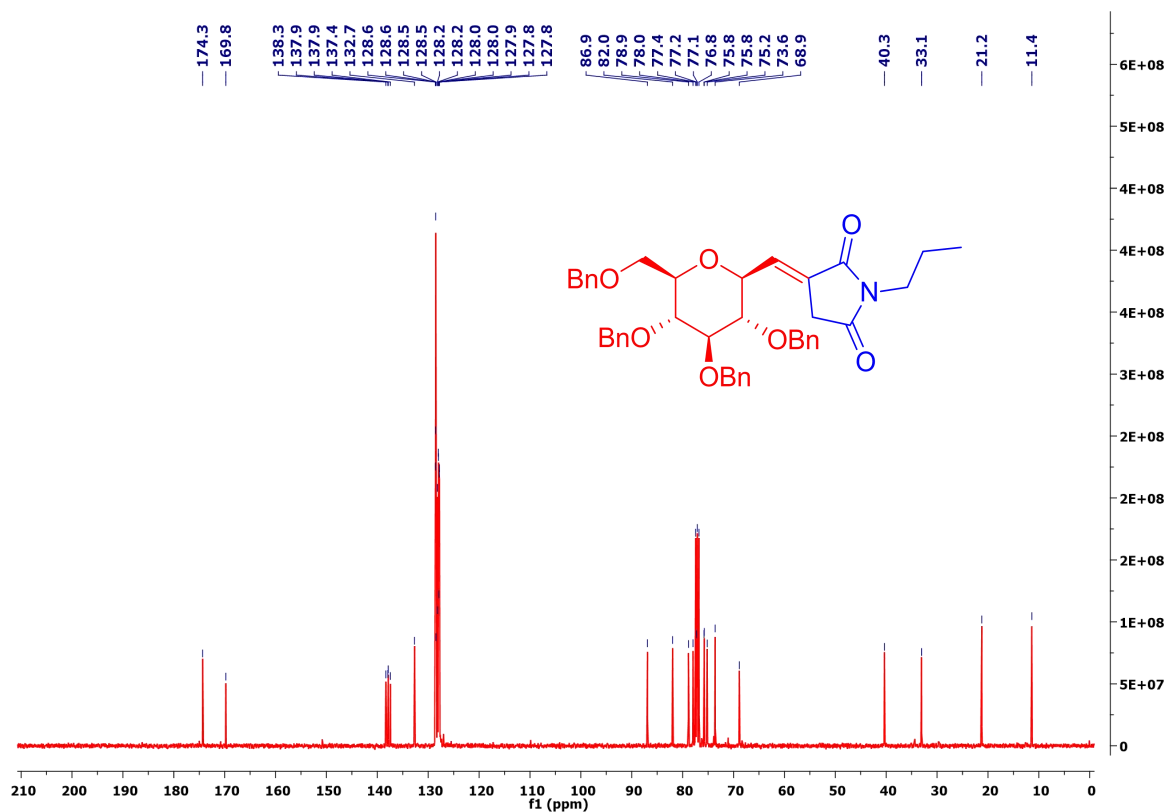



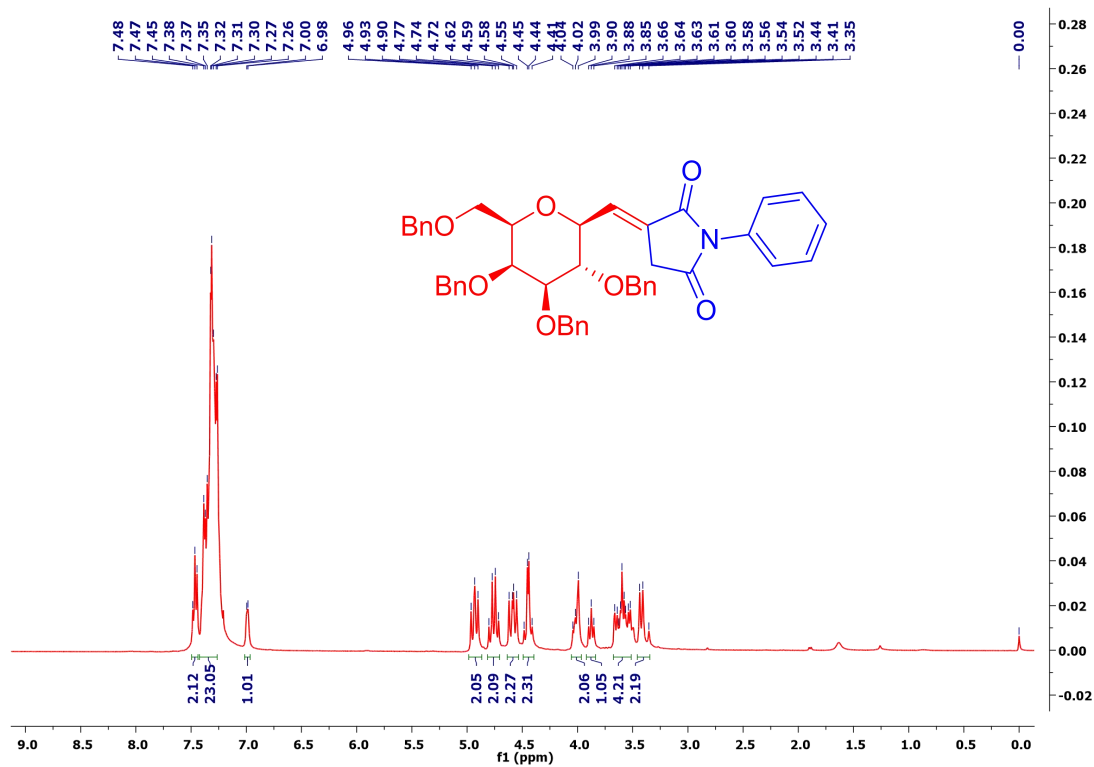

**Figure S21.**  $^1\text{H}$  NMR spectrum of compound **3k** (400 MHz,  $\text{CDCl}_3$ ).

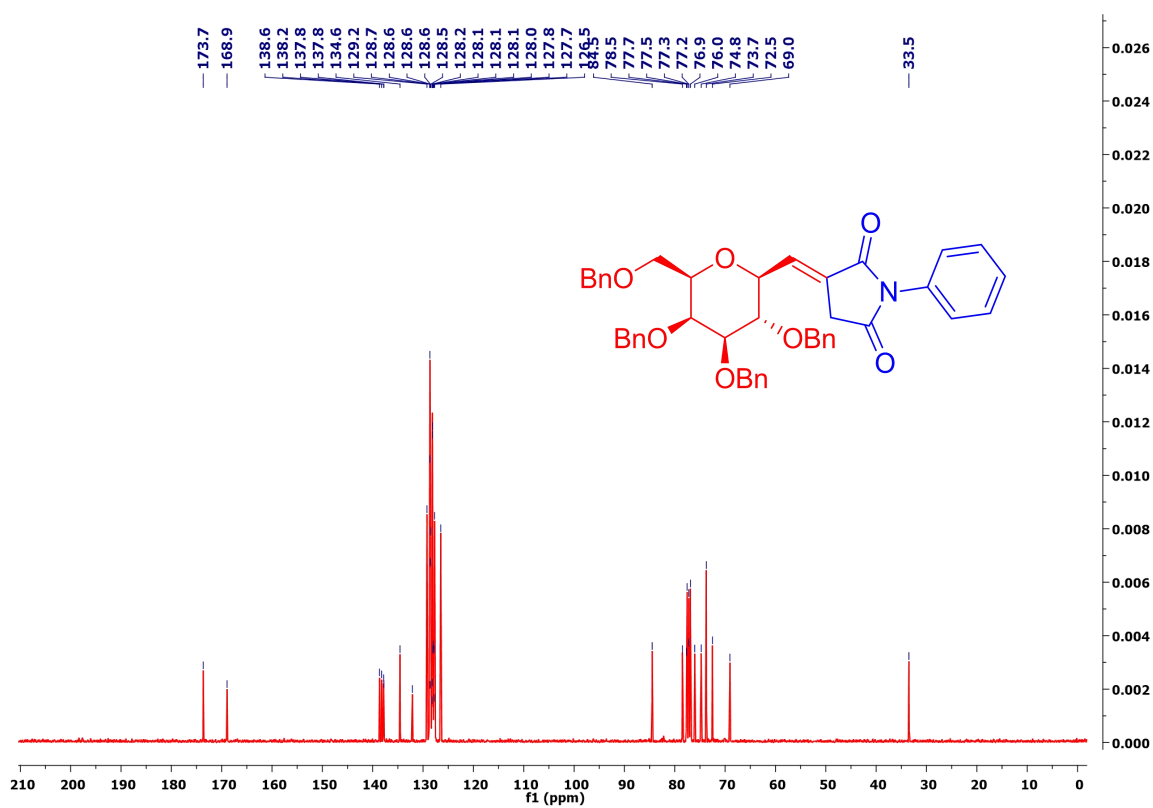

**Figure S22.**  $^{13}\text{C}$  NMR spectrum of compound **3k** (100.6 MHz,  $\text{CDCl}_3$ ).

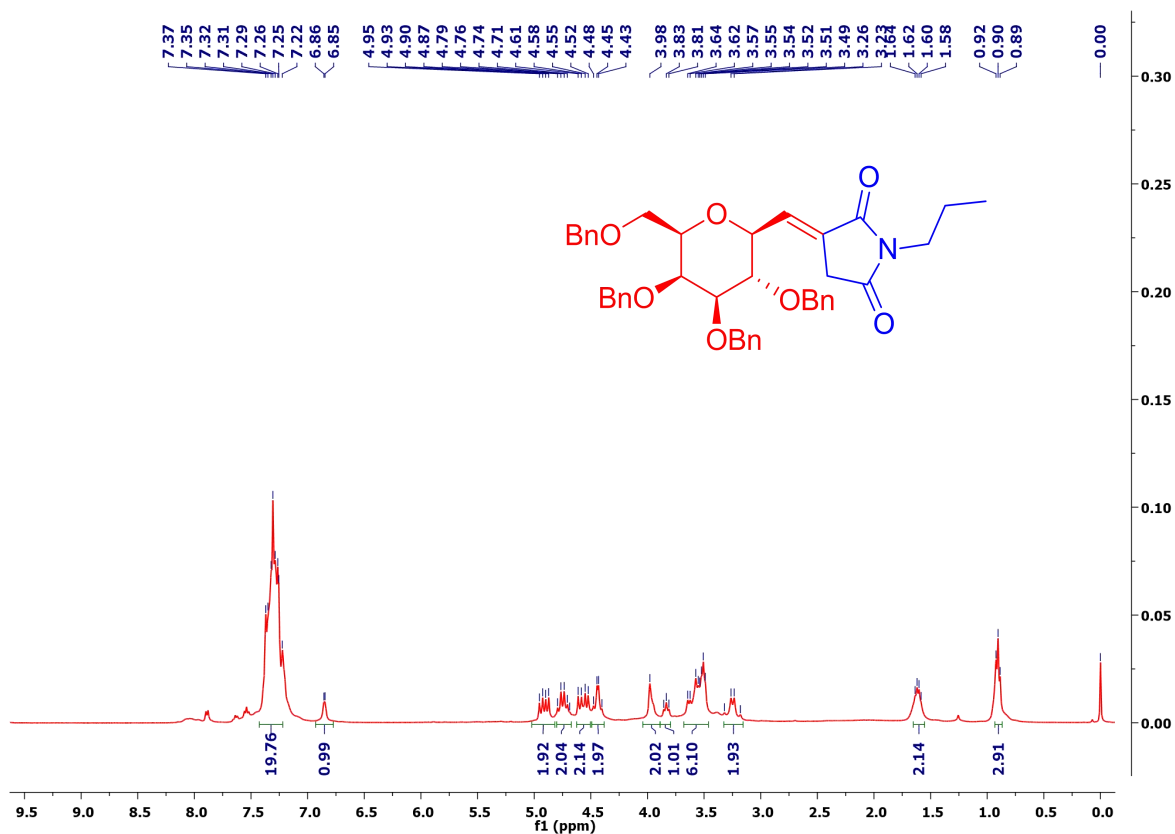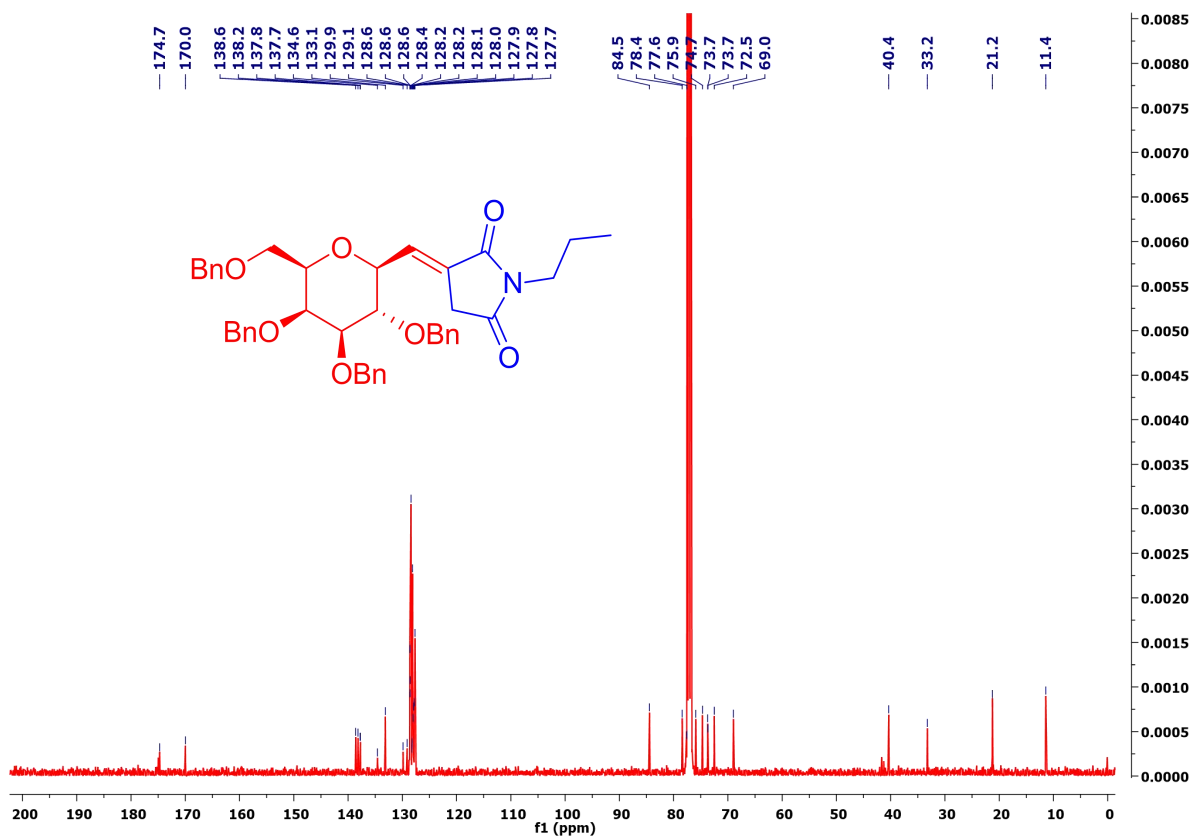

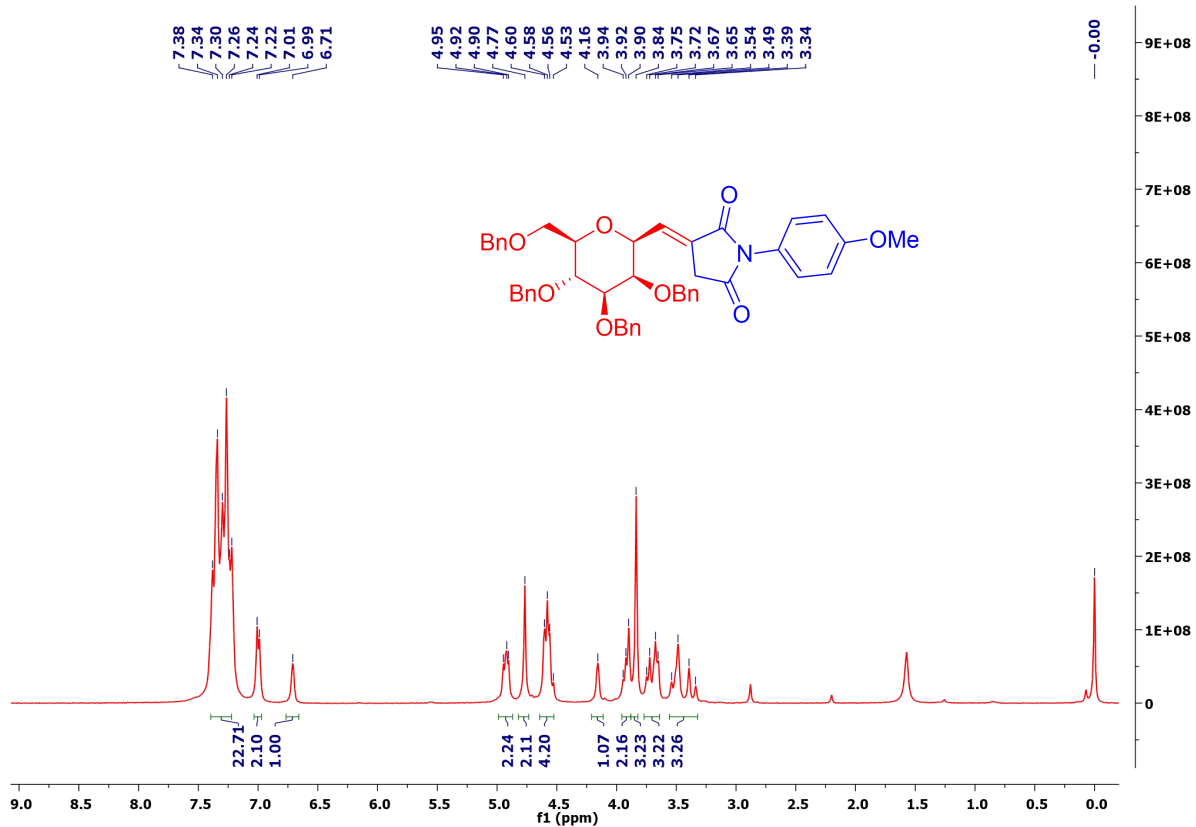

Figure S25. <sup>1</sup>H NMR spectrum of compound **3m** (400 MHz, CDCl<sub>3</sub>).

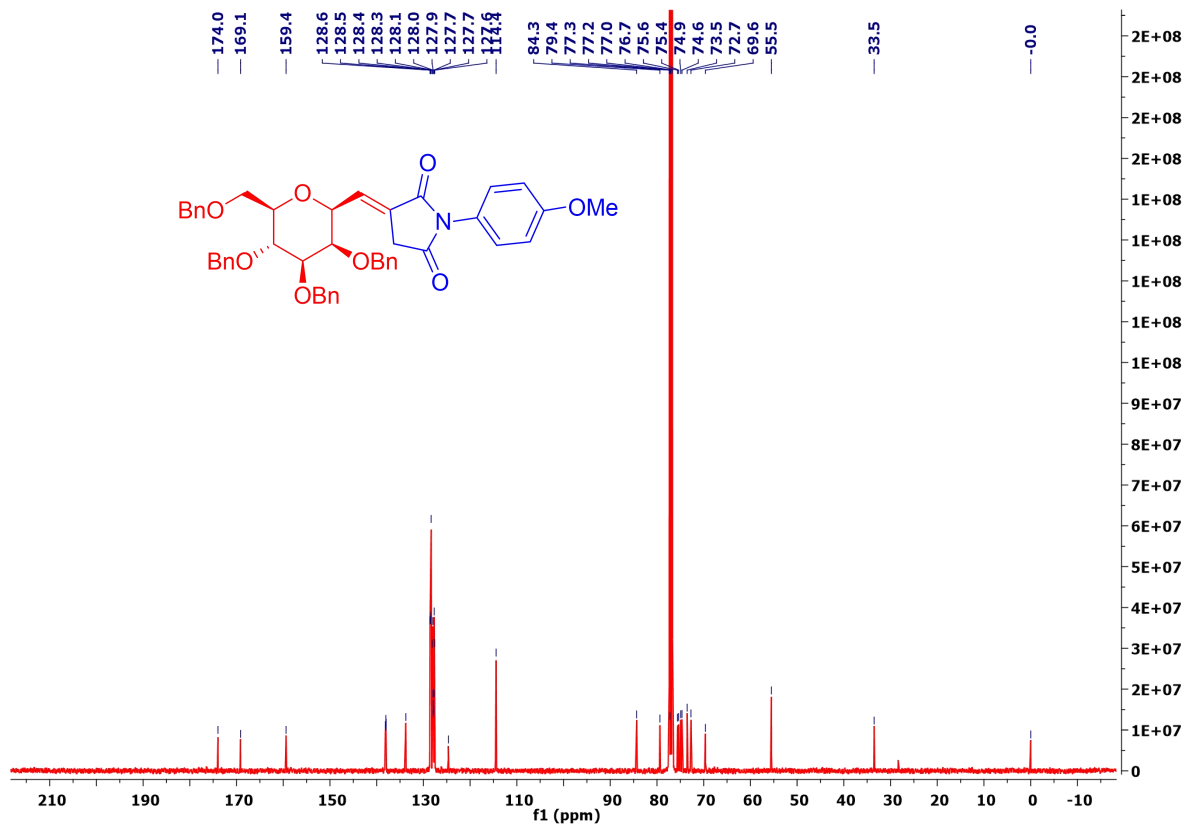

Figure S26. <sup>13</sup>C NMR spectrum of compound **3m** (100.6 MHz, CDCl<sub>3</sub>).

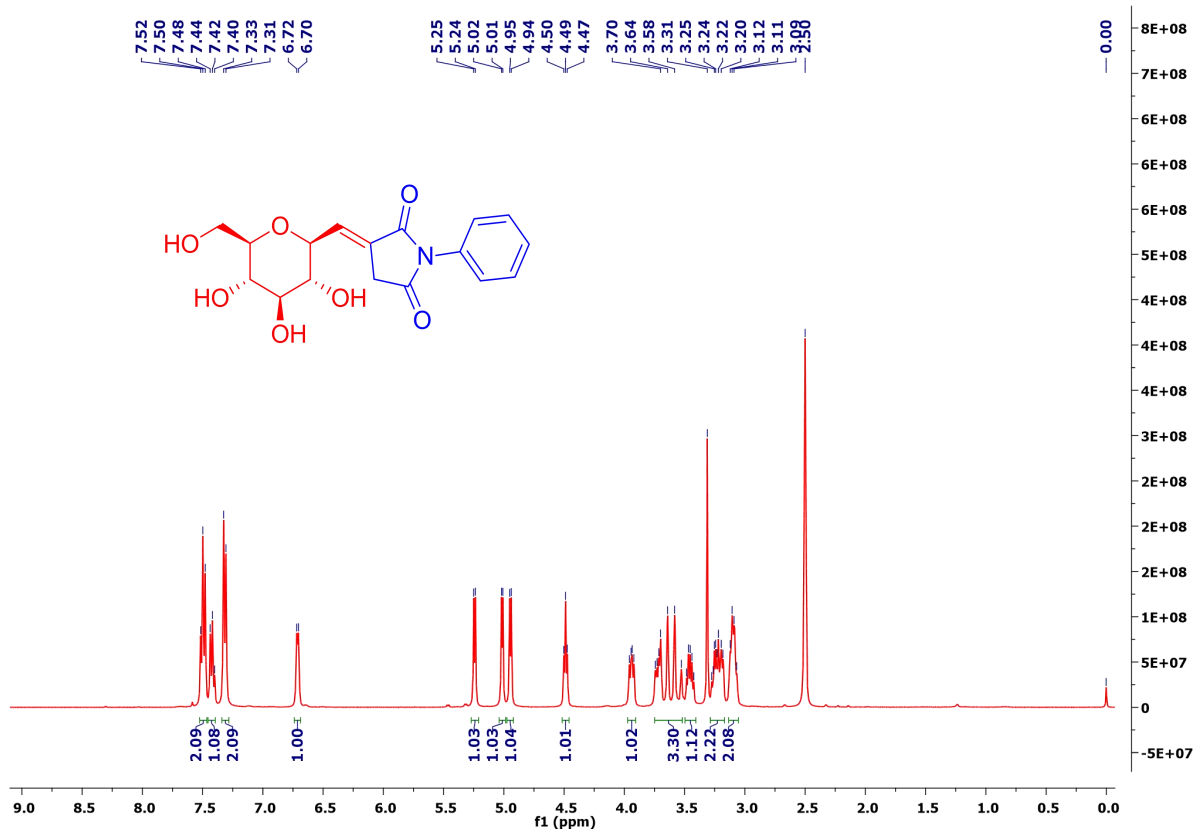

Figure S27.  $^1\text{H}$  NMR spectrum of compound 4a (400 MHz,  $\text{DMSO-}d_6$ ).

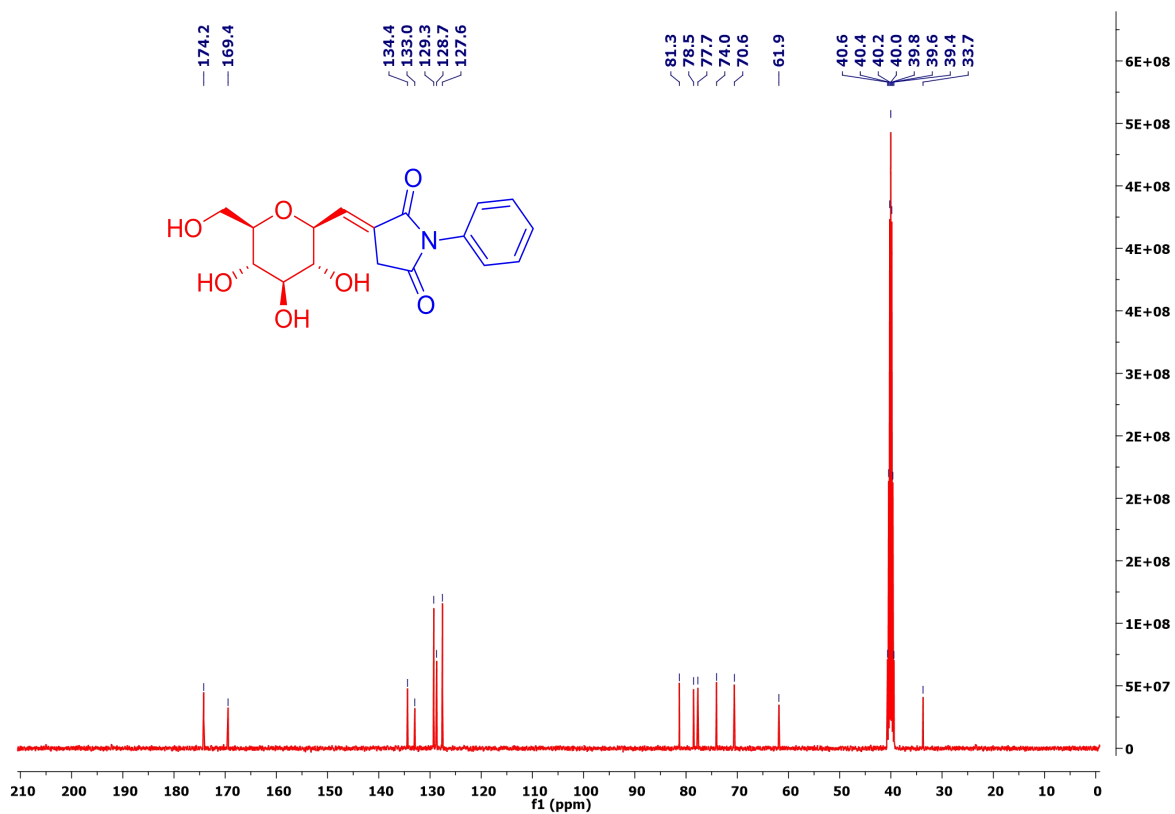

Figure S28.  $^{13}\text{C}$  NMR spectrum of compound 4a (100.6 MHz,  $\text{DMSO-}d_6$ ).

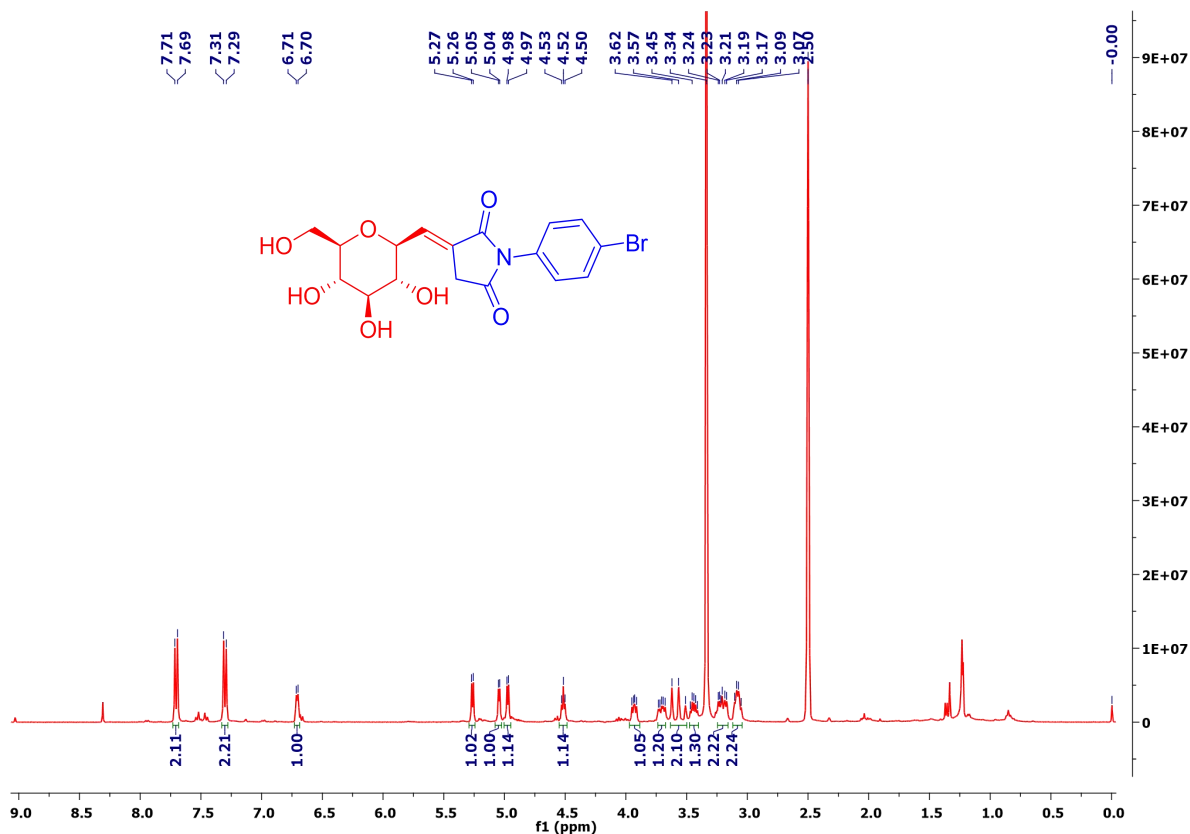

Figure S29. <sup>1</sup>H NMR spectrum of compound **4b** (400 MHz, DMSO-*d*<sub>6</sub>).

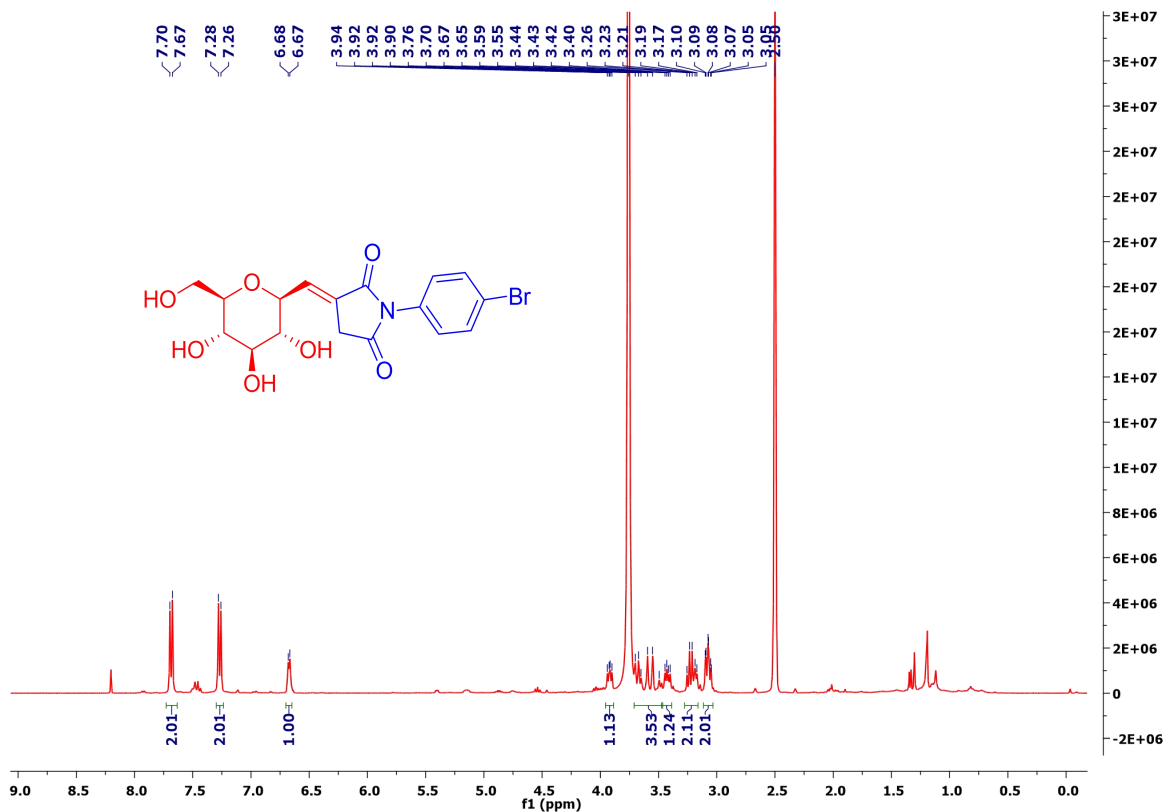

Figure S30. <sup>1</sup>H NMR spectrum of compound **4b** (400 MHz, D<sub>2</sub>O-DMSO-*d*<sub>6</sub>).

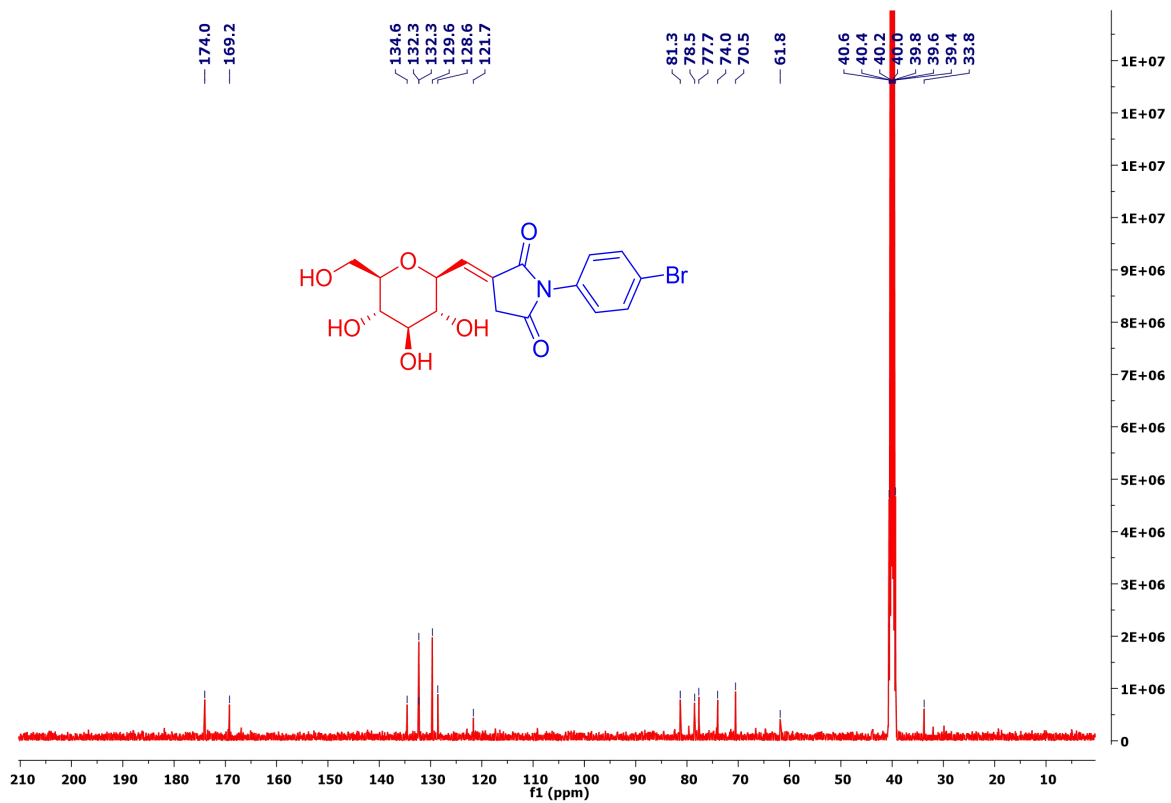

**Figure S31.**  $^{13}\text{C}$  NMR spectrum of compound **4b** (100.6 MHz,  $\text{DMSO-}d_6$ ).

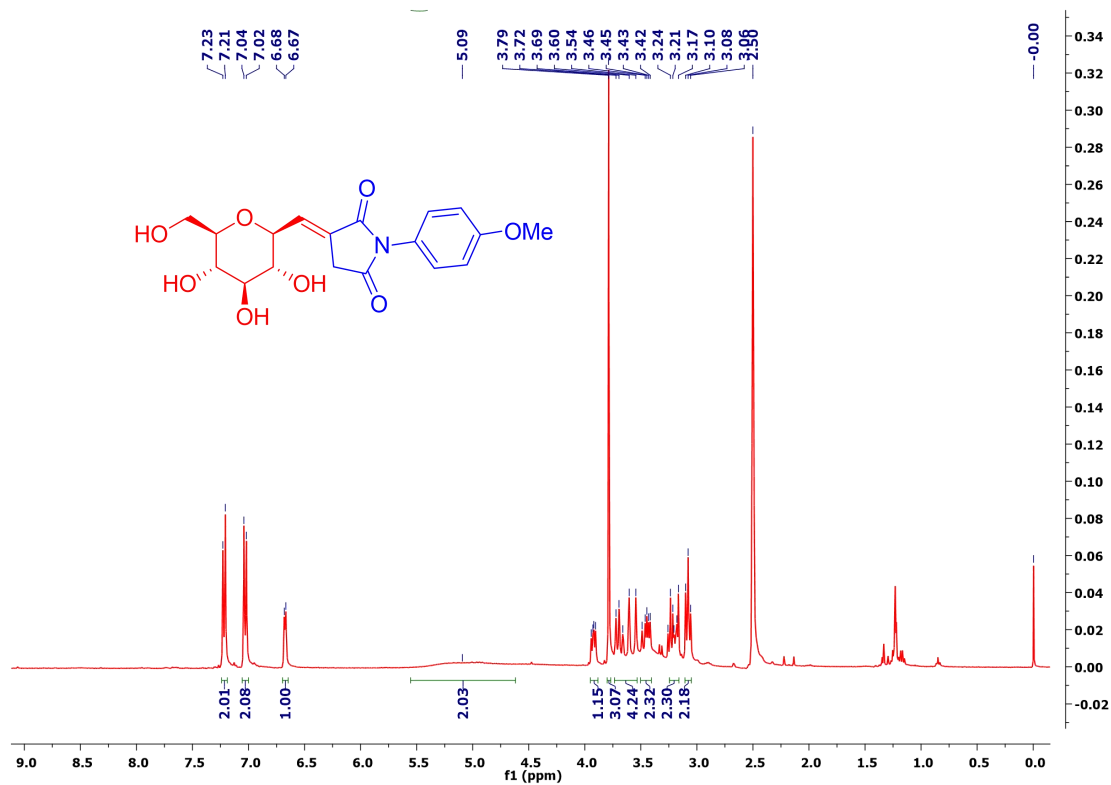

Figure S32.  $^1\text{H}$  NMR spectrum of compound 4c (400 MHz,  $\text{DMSO-}d_6$ ).

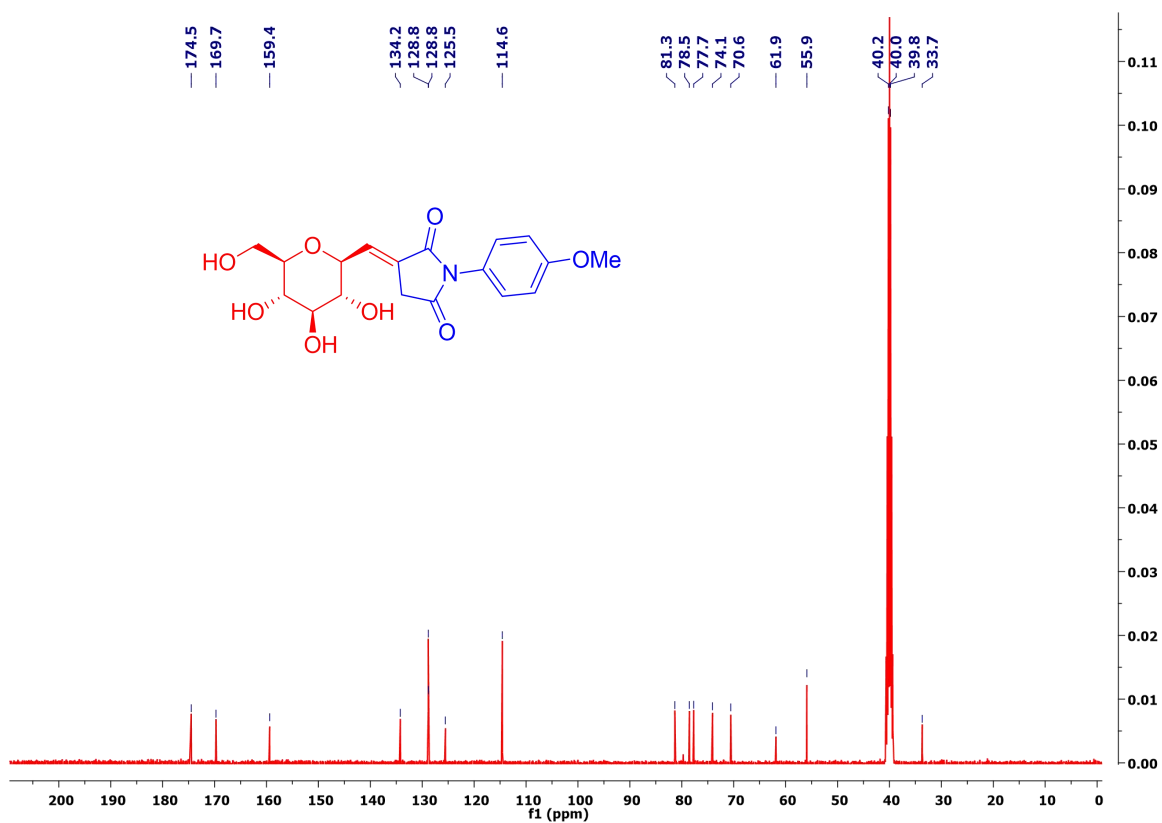

Figure S33.  $^{13}\text{C}$  NMR spectrum of compound 4c (100.6 MHz,  $\text{DMSO-}d_6$ ).

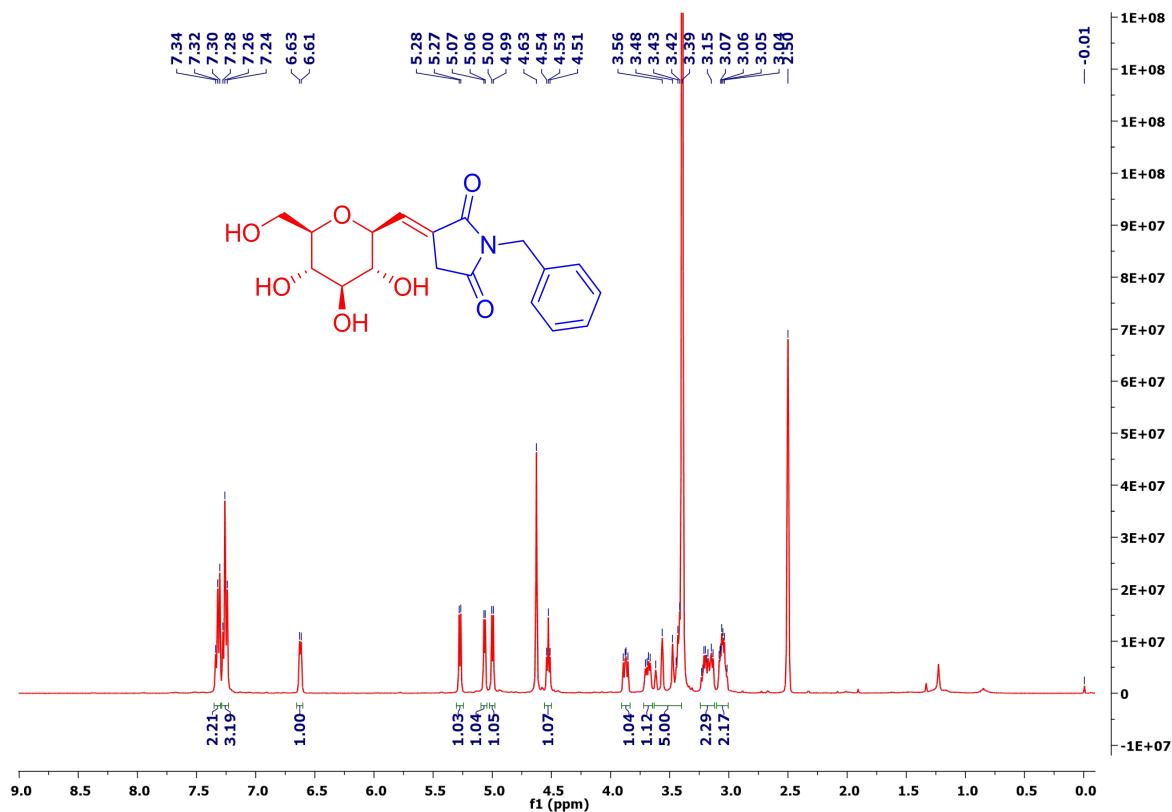

Figure S34. <sup>1</sup>H NMR spectrum of compound 4d (400 MHz, DMSO-*d*<sub>6</sub>).

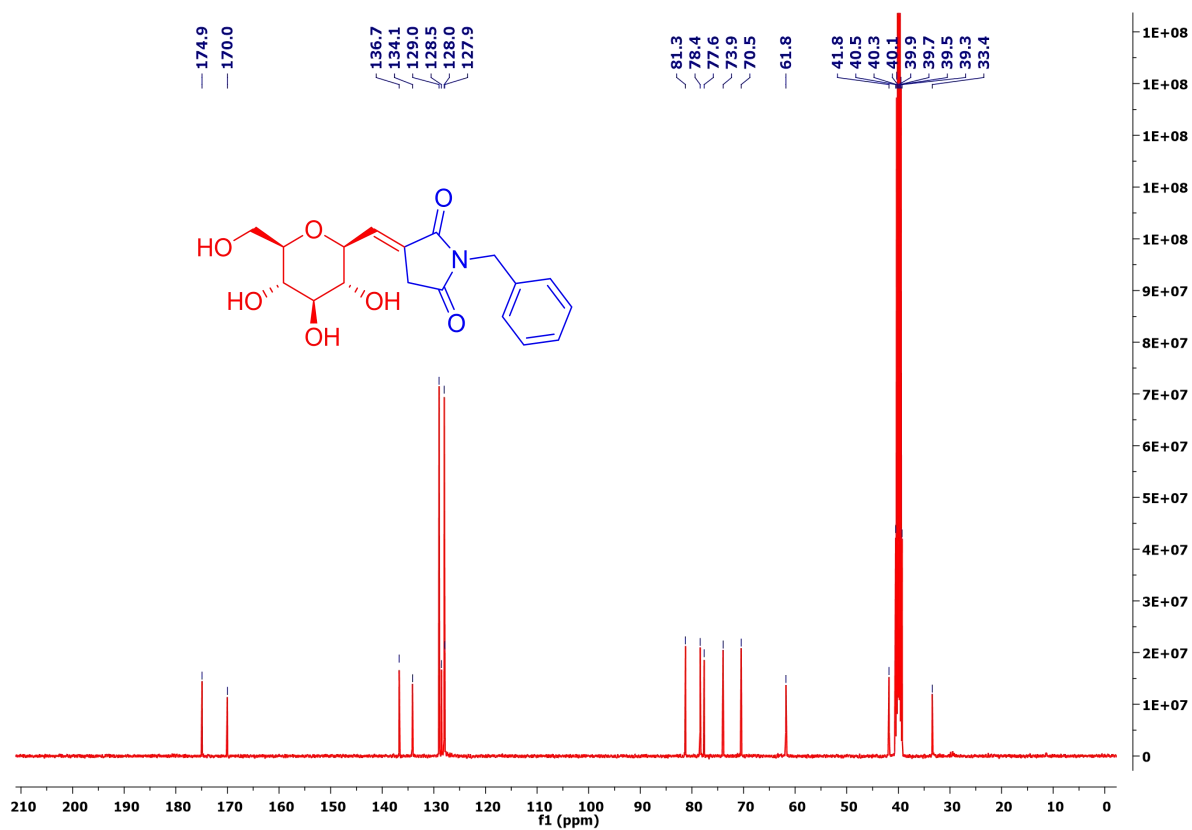

Figure S35. <sup>13</sup>C NMR spectrum of compound 4d (100.6 MHz, DMSO-*d*<sub>6</sub>).



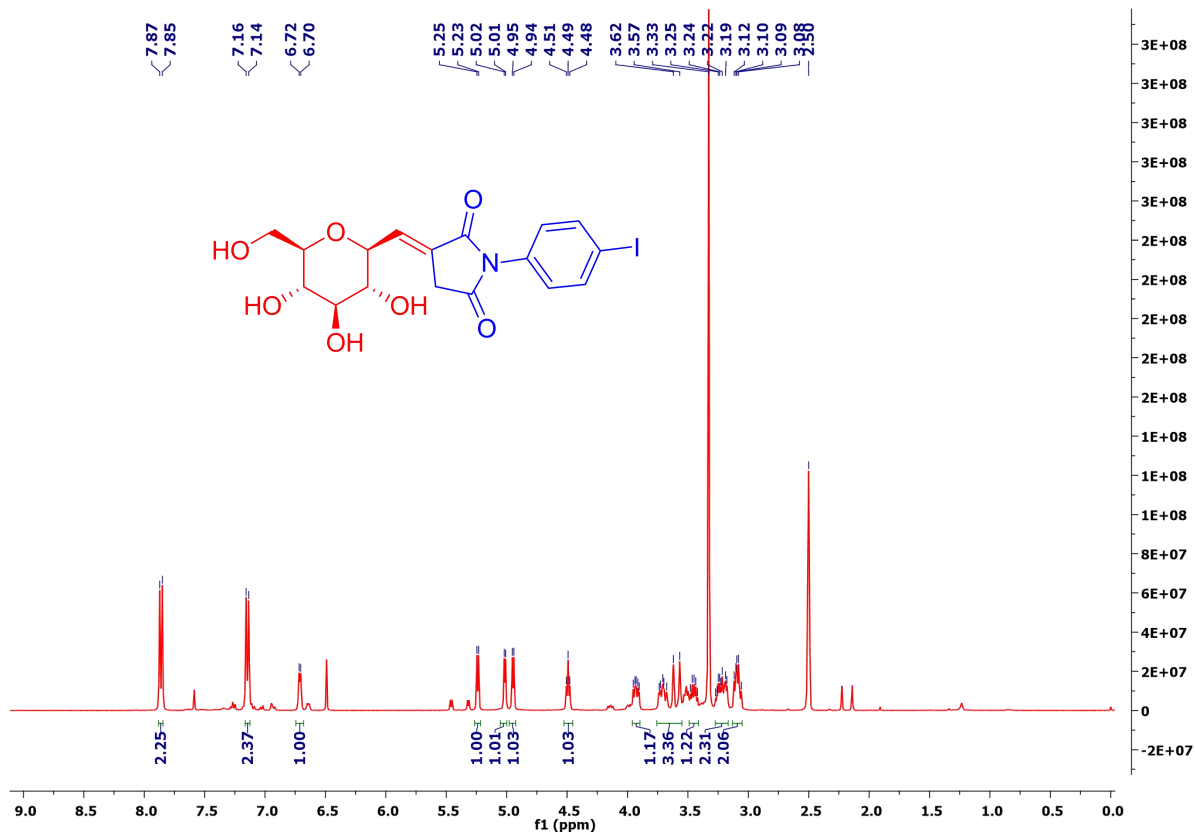

Figure S36.  $^1\text{H}$  NMR spectrum of compound **4e** (400 MHz,  $\text{DMSO-}d_6$ ).

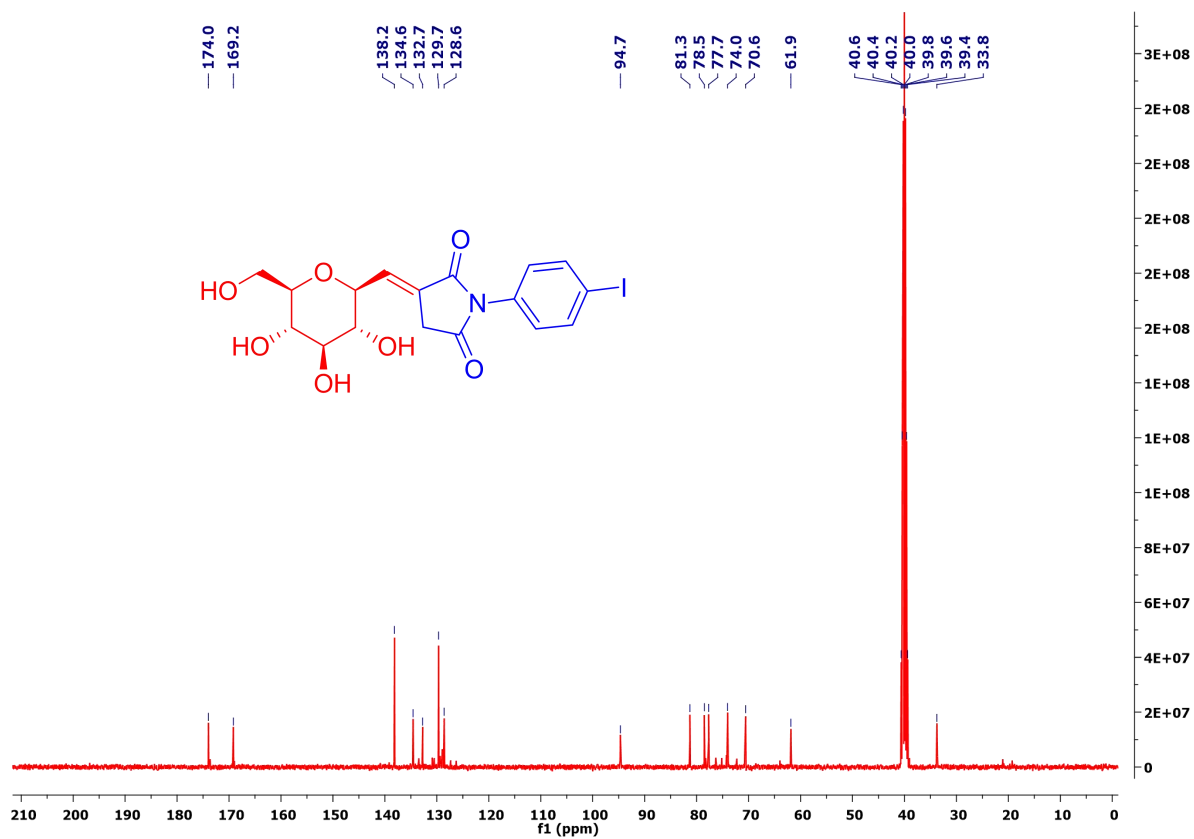

Figure S37.  $^{13}\text{C}$  NMR spectrum of compound **4e** (100.6 MHz,  $\text{DMSO-}d_6$ ).

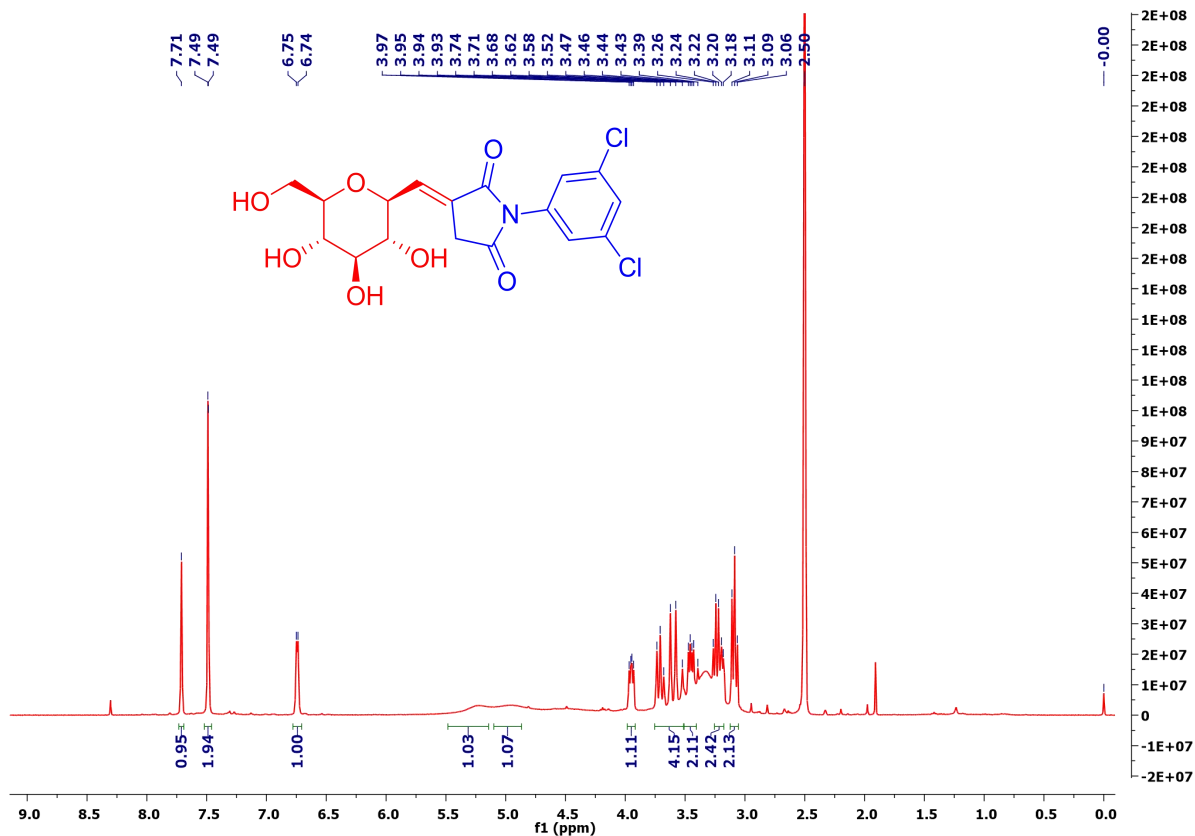

Figure S38. <sup>1</sup>H NMR spectrum of compound 4f (400 MHz, DMSO-*d*<sub>6</sub>).

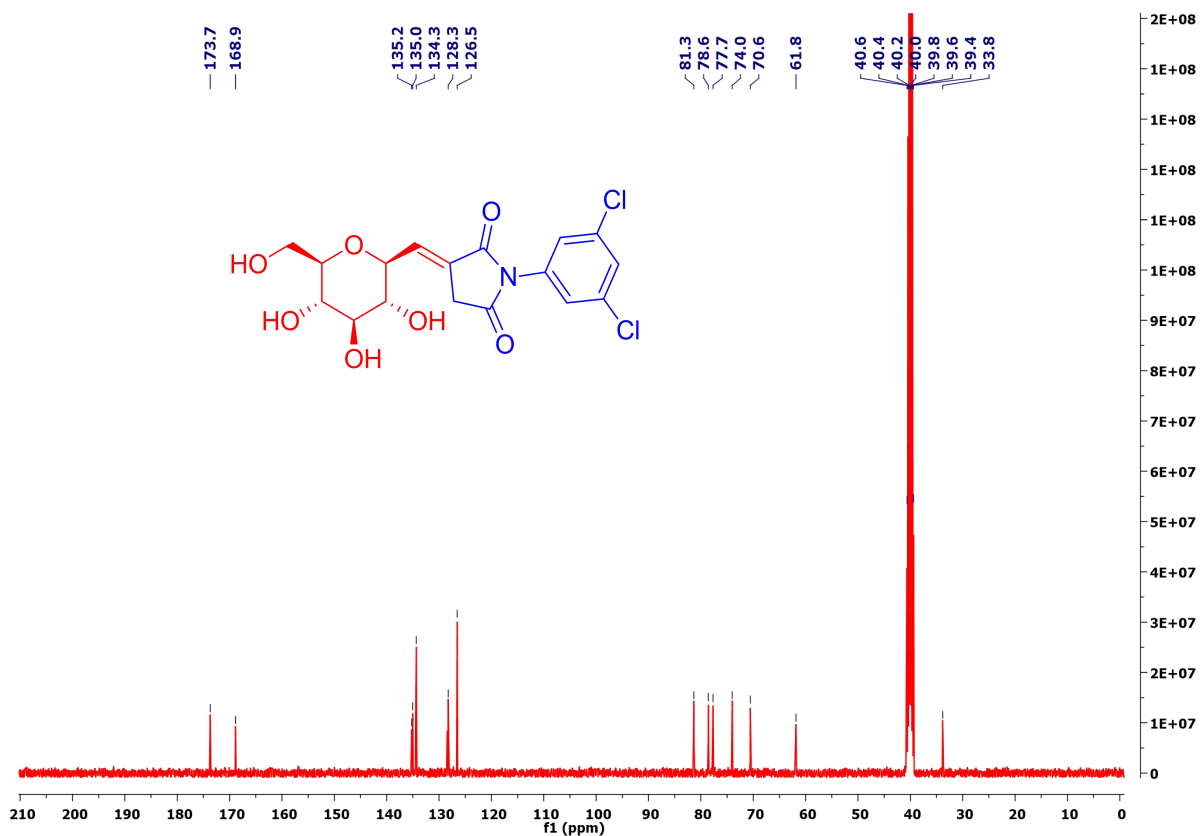

Figure S39. <sup>13</sup>C NMR spectrum of compound 4f (100.6 MHz, DMSO-*d*<sub>6</sub>).

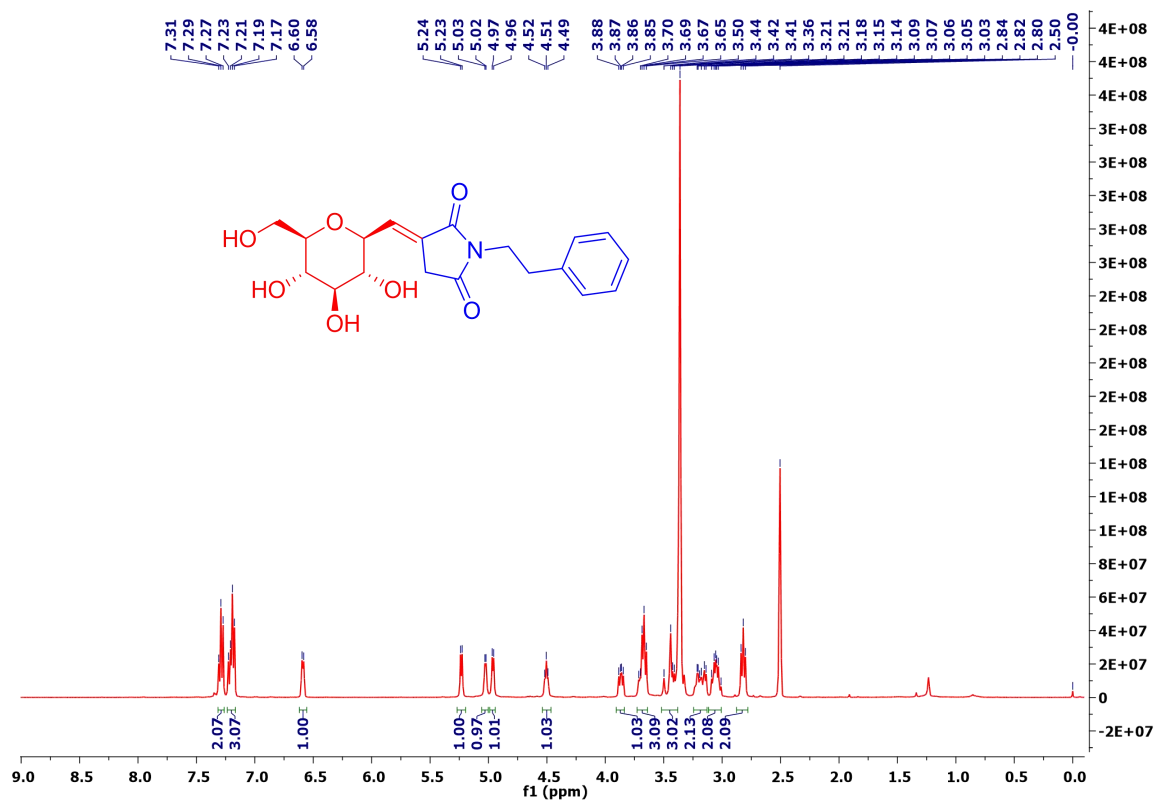

Figure S40.  $^1\text{H}$  NMR spectrum of compound **4g** (400 MHz,  $\text{DMSO-}d_6$ ).

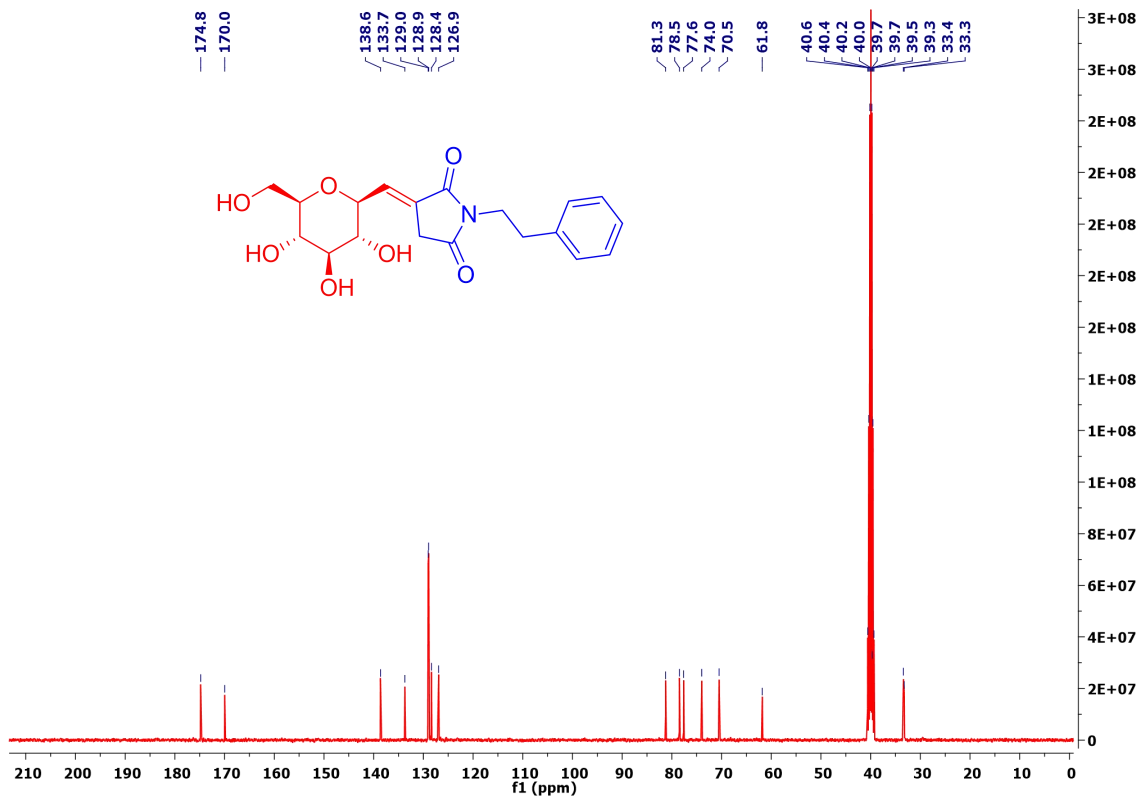

Figure S41.  $^{13}\text{C}$  NMR spectrum of compound **4g** (100.6 MHz,  $\text{DMSO-}d_6$ ).

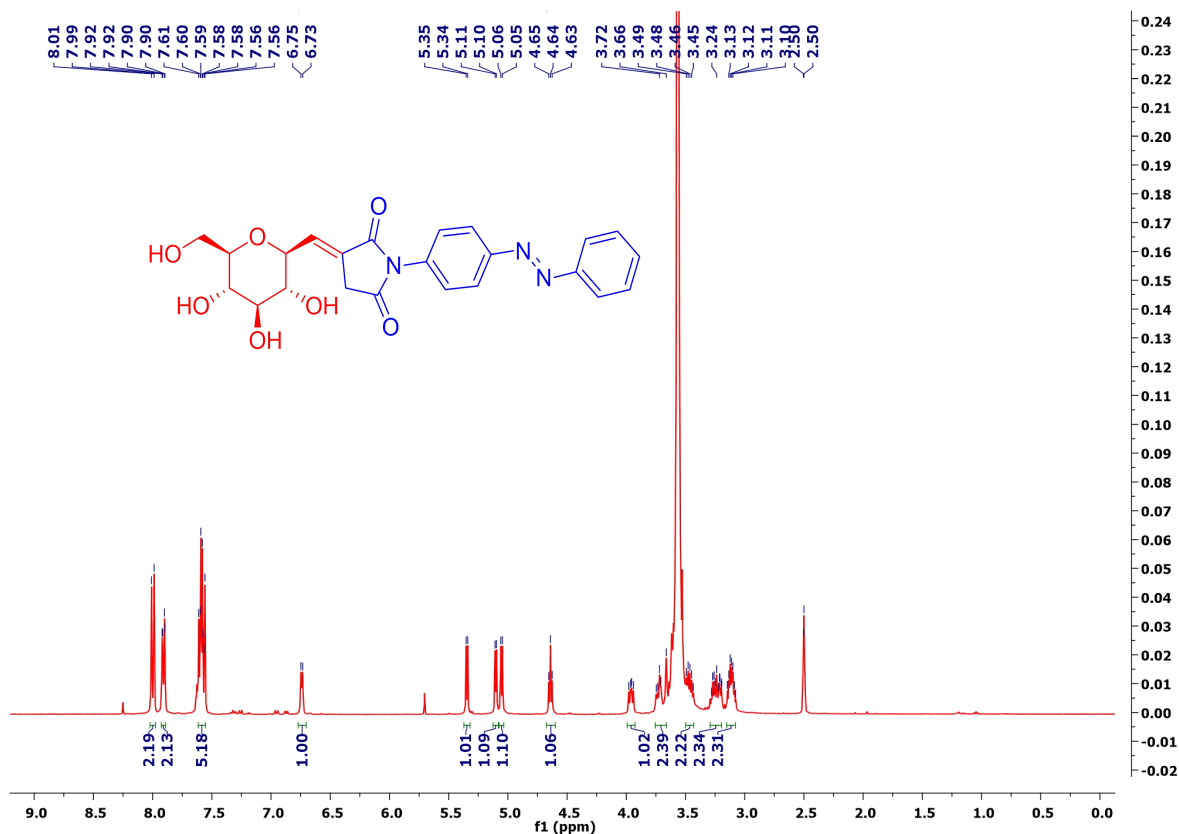

Figure S42.  $^1\text{H}$  NMR spectrum of compound 4h (400 MHz,  $\text{DMSO}-d_6$ ).

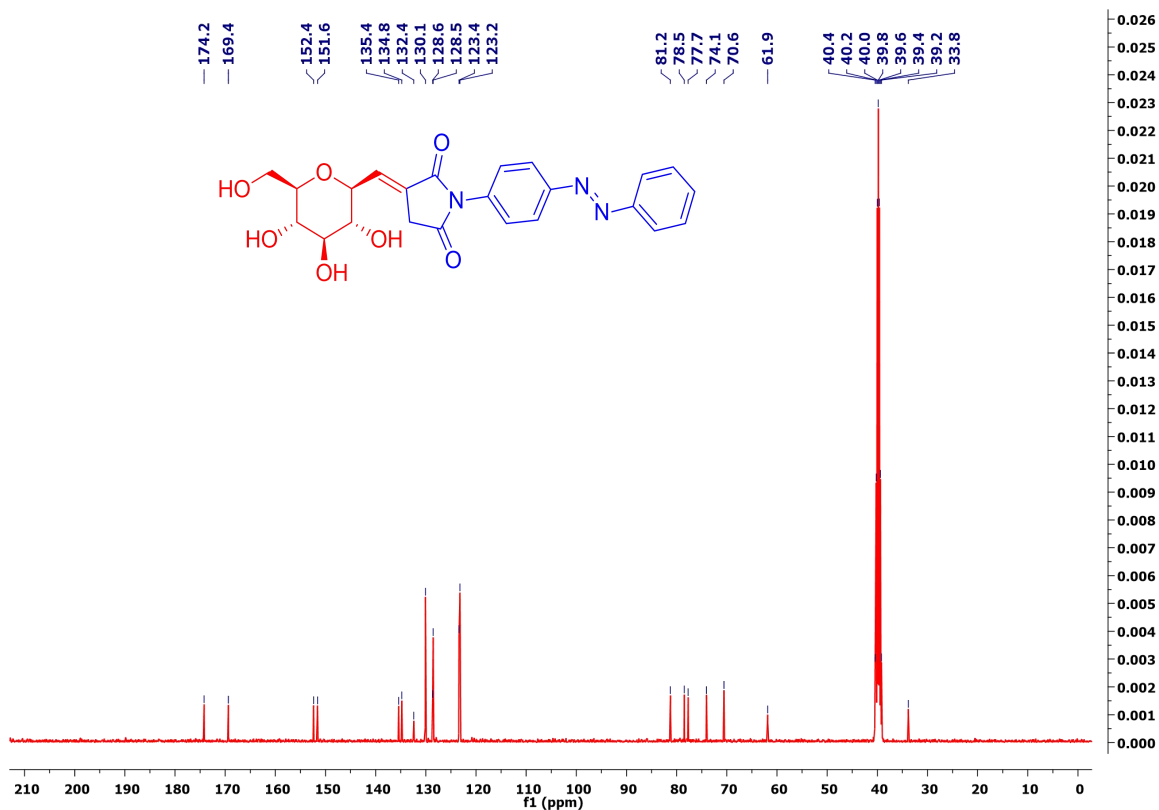

Figure S43.  $^{13}\text{C}$  NMR spectrum of compound 4h (100.6 MHz,  $\text{DMSO}-d_6$ ).

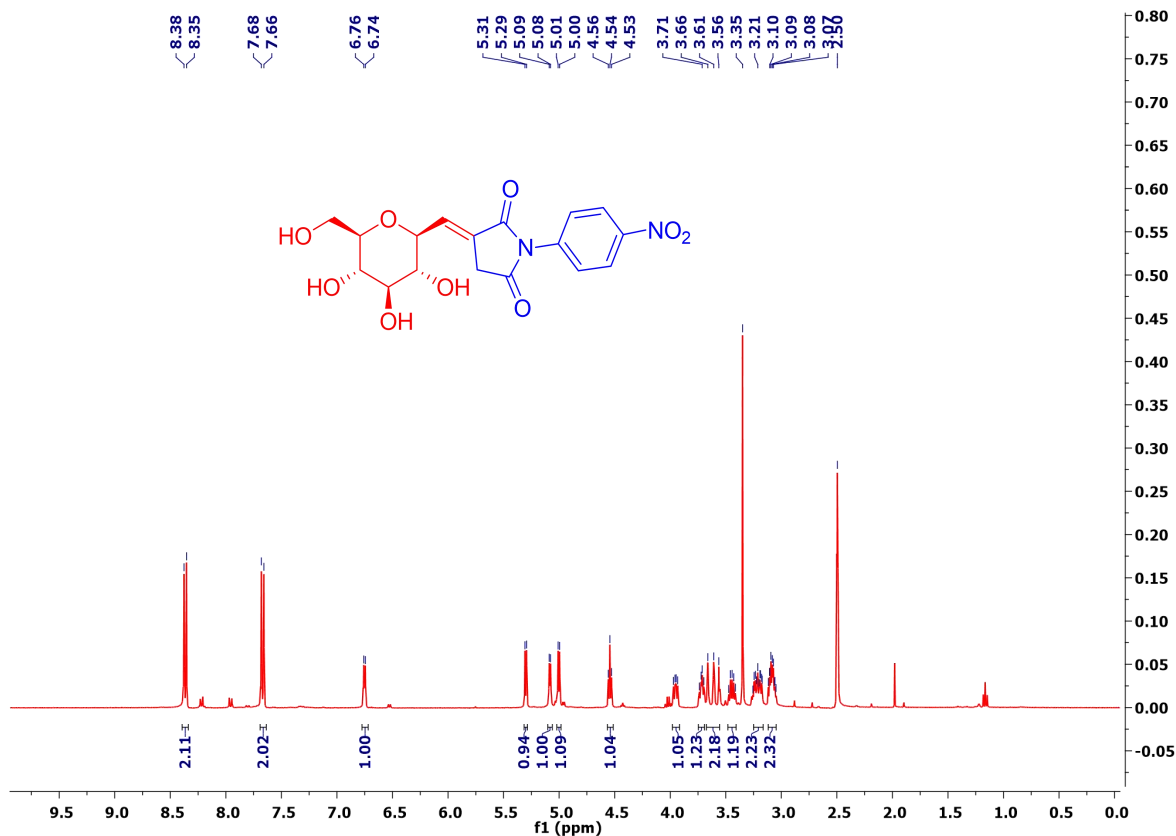

Figure S44.  $^1\text{H}$  NMR spectrum of compound **4i** (400 MHz,  $\text{DMSO-}d_6$ ).

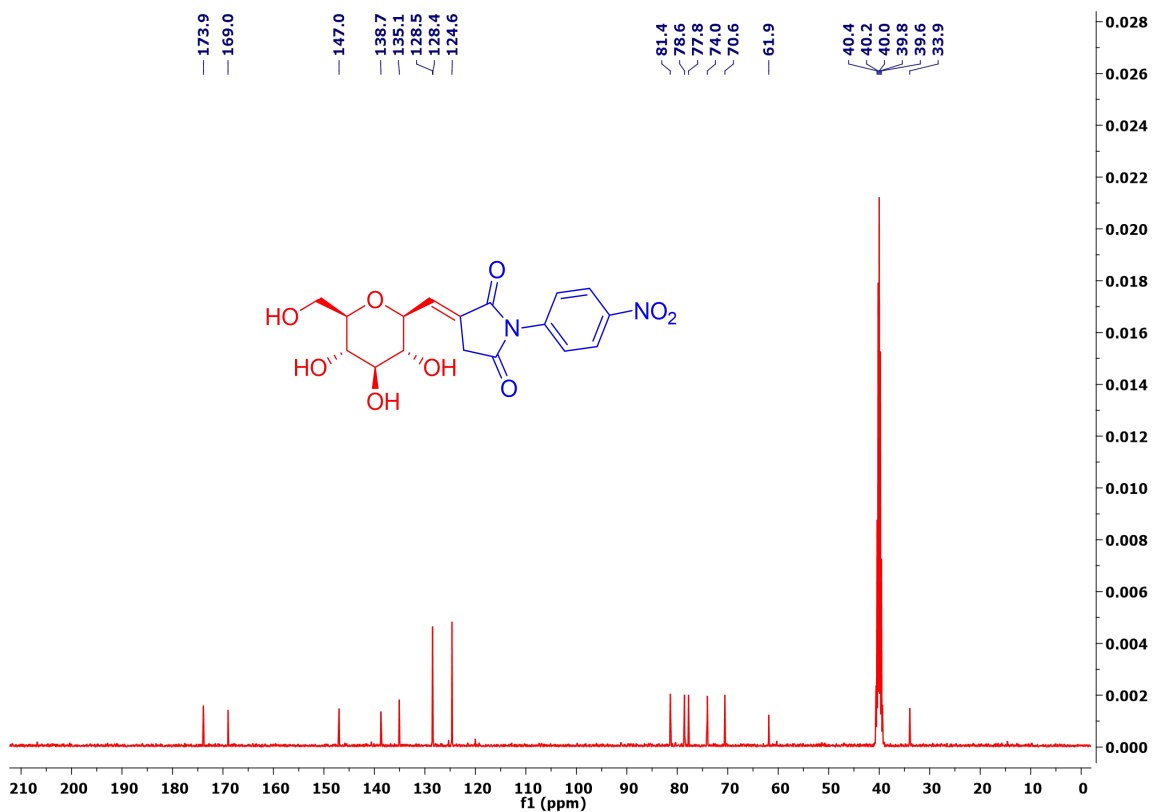

Figure S45.  $^{13}\text{C}$  NMR spectrum of compound **4i** (100.6 MHz,  $\text{DMSO-}d_6$ ).

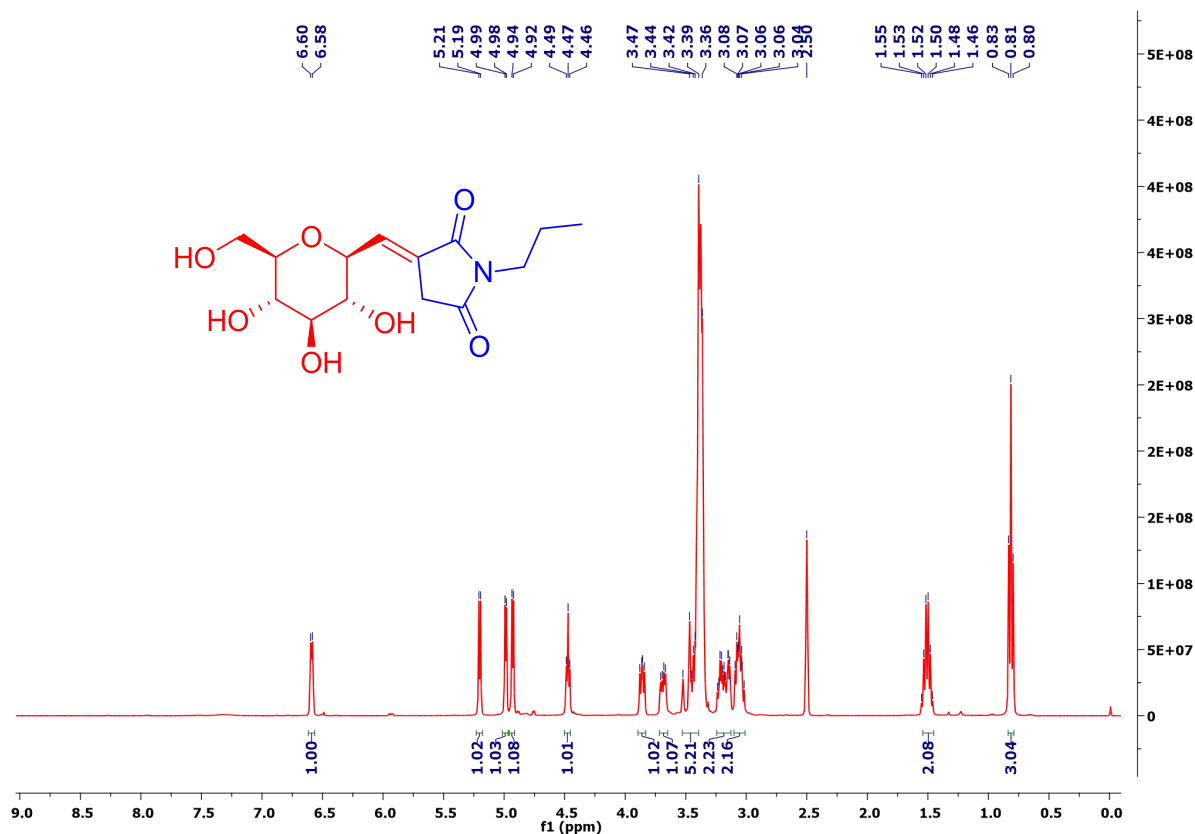

Figure S46.  $^1\text{H}$  NMR spectrum of compound 4j (400 MHz,  $\text{DMSO-}d_6$ ).

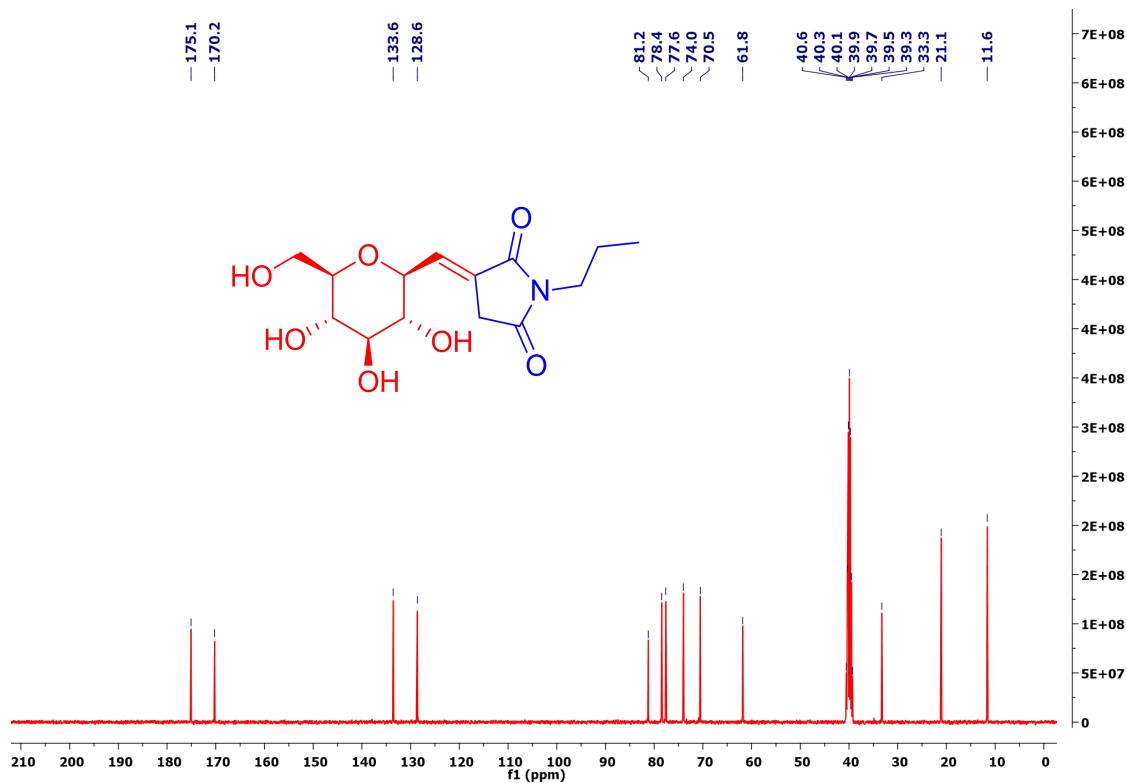

Figure S47.  $^{13}\text{C}$  NMR spectrum of compound 4j (100.6 MHz,  $\text{DMSO-}d_6$ ).

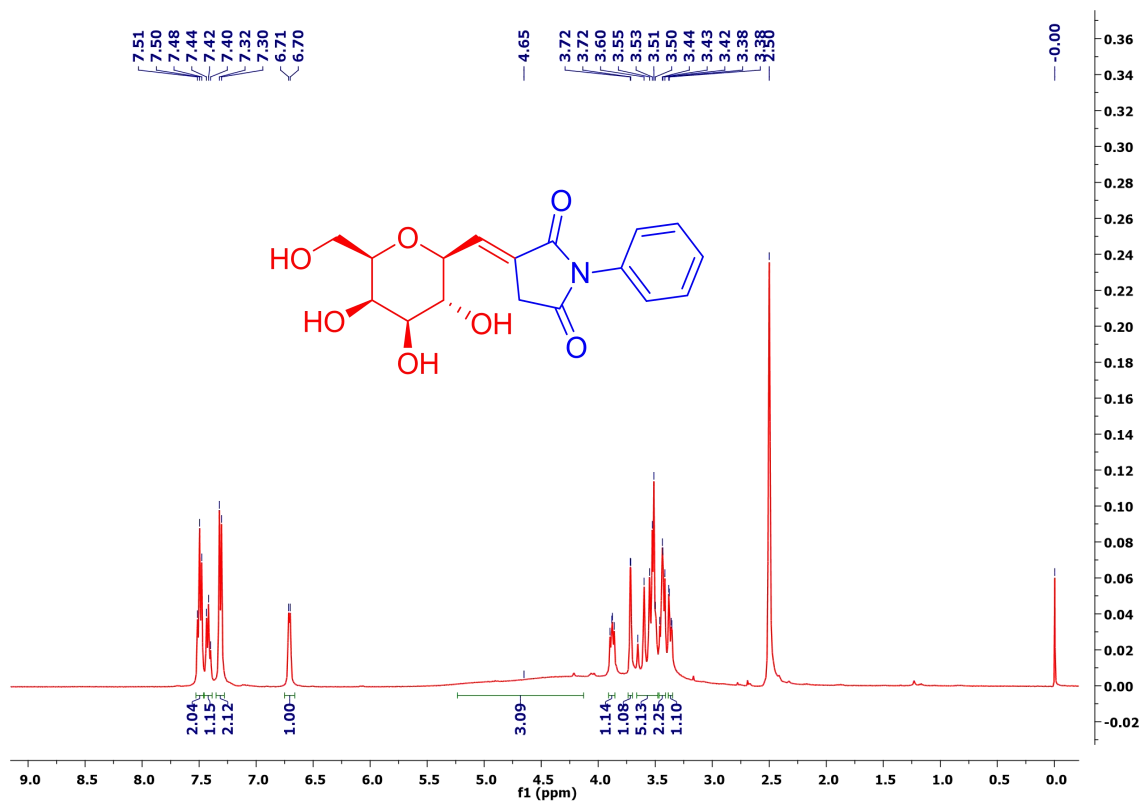

Figure S48.  $^1\text{H}$  NMR spectrum of compound **4k** (400 MHz,  $\text{DMSO-}d_6$ ).

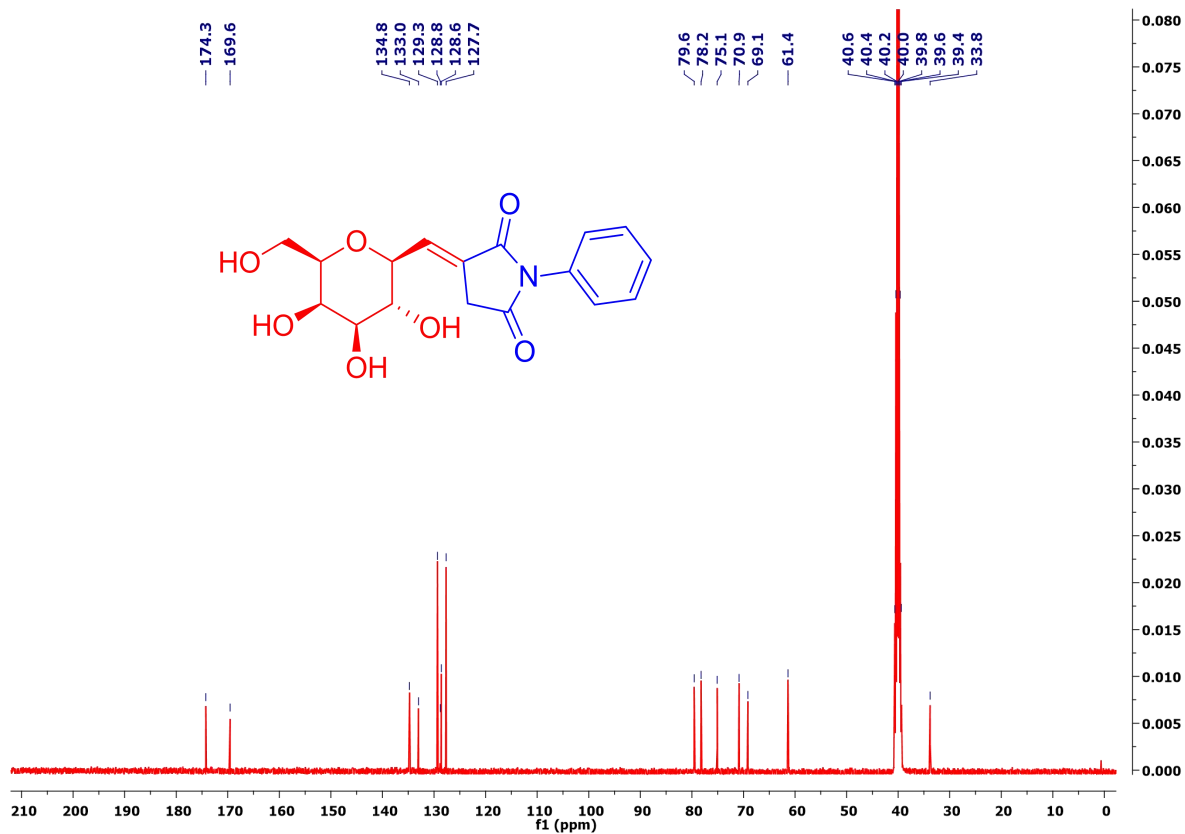

Figure S49.  $^{13}\text{C}$  NMR spectrum of compound **4k** (100.6 MHz,  $\text{DMSO-}d_6$ ).

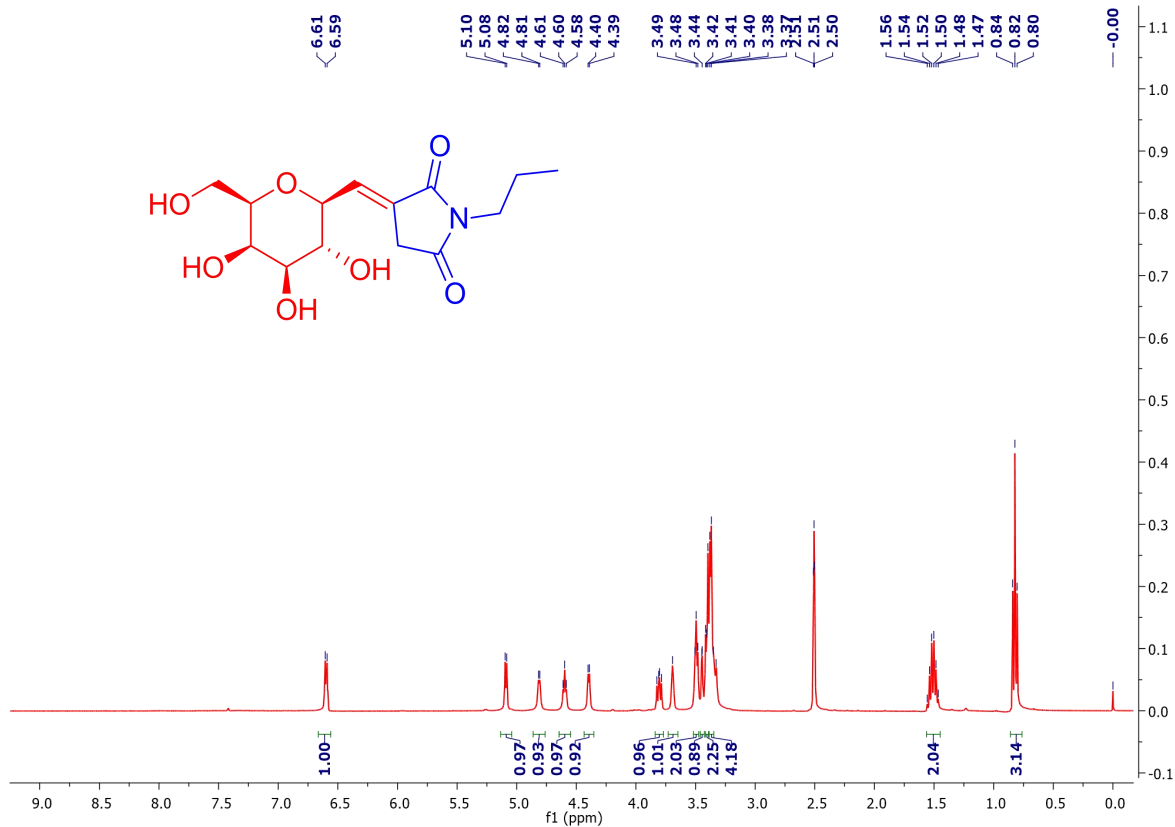

Figure S50.  $^1\text{H}$  NMR spectrum of compound 4l (400 MHz,  $\text{DMSO-}d_6$ ).

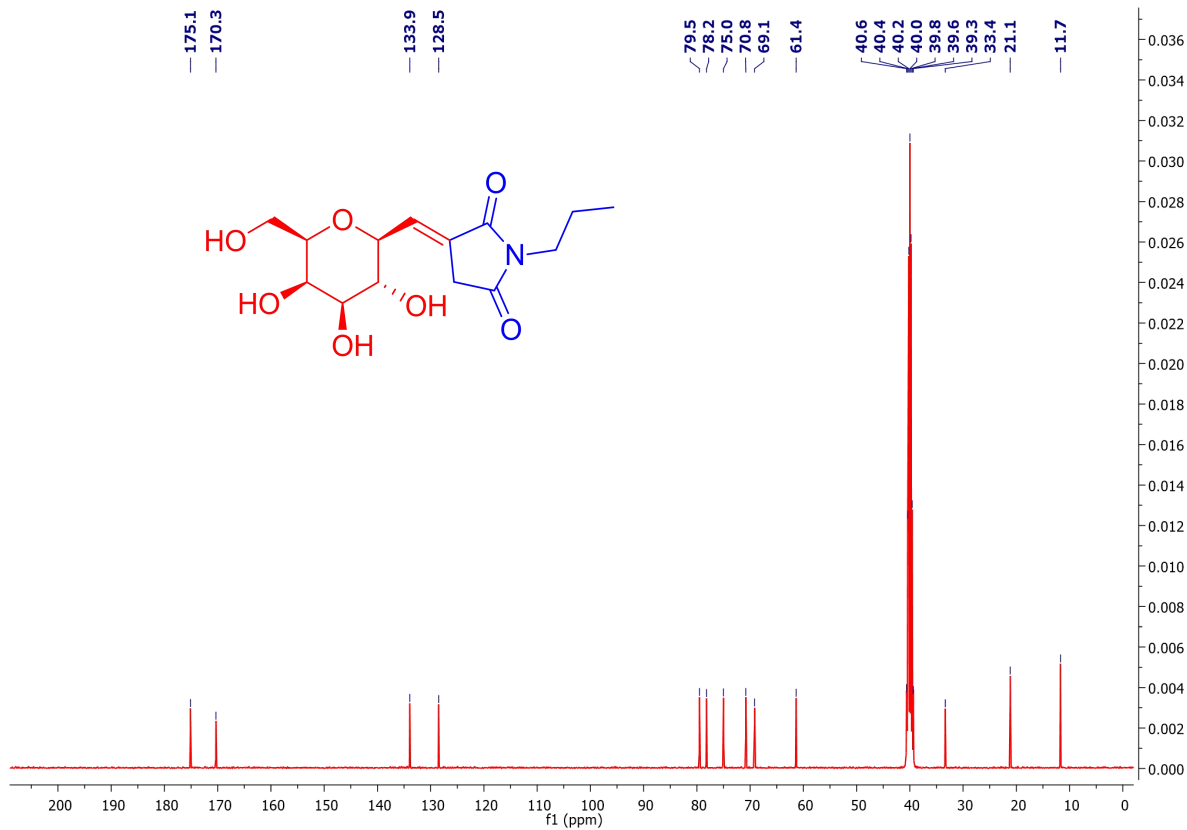

Figure S51.  $^{13}\text{C}$  NMR spectrum of compound 4l (100.6 MHz,  $\text{DMSO-}d_6$ ).



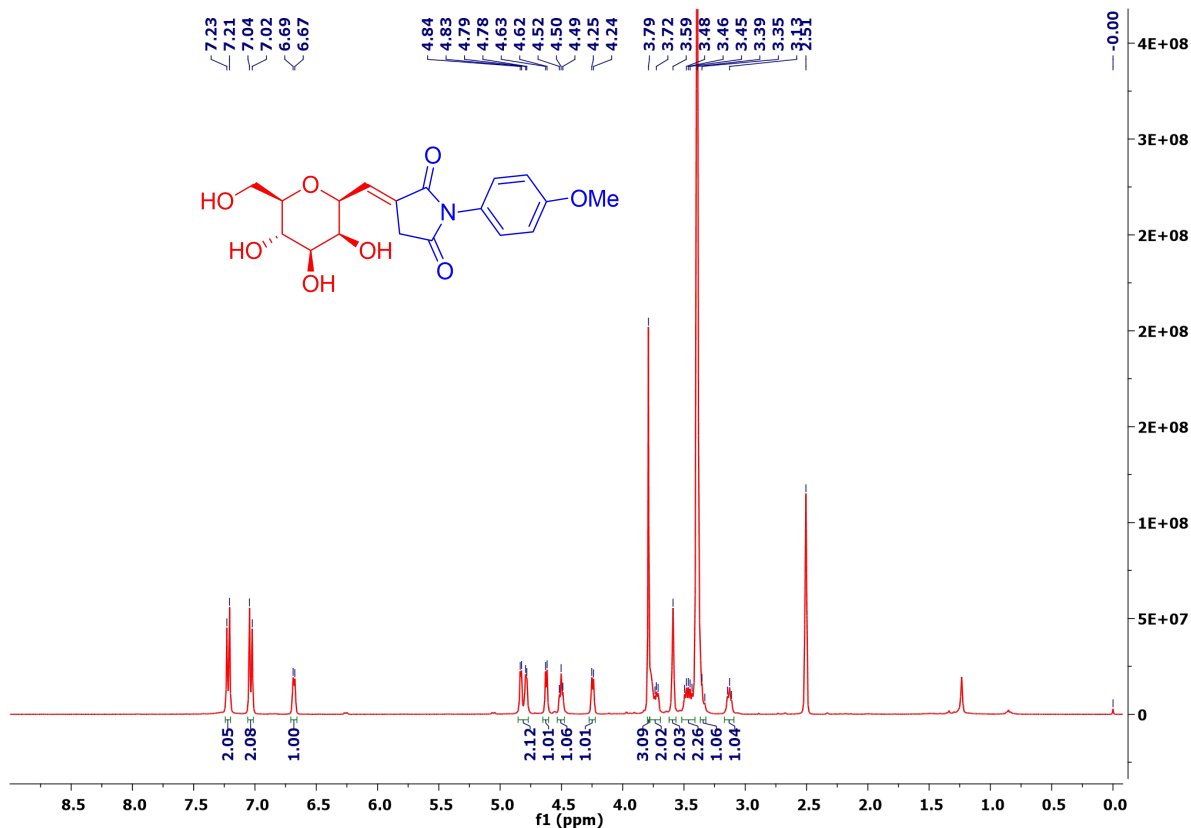

Figure S52.  $^1\text{H}$  NMR spectrum of compound 4m (400 MHz,  $\text{DMSO-}d_6$ ).

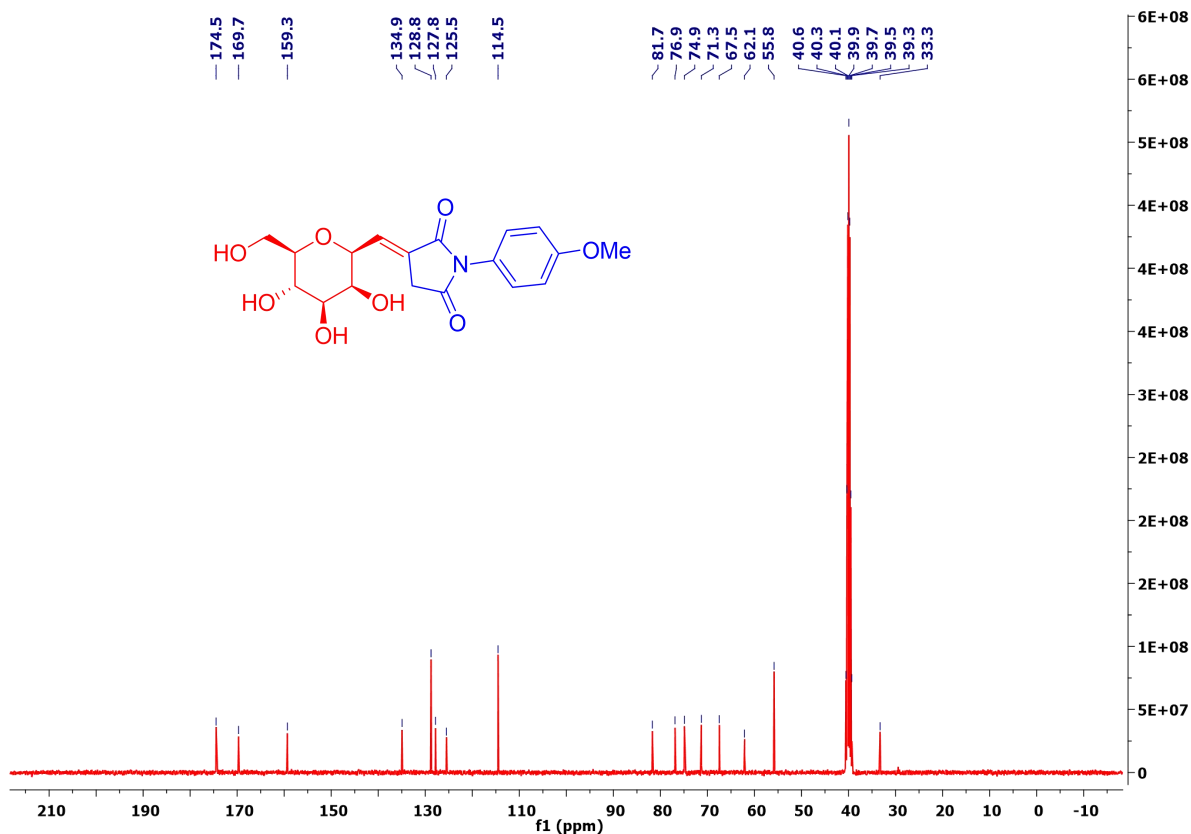

Figure S53.  $^{13}\text{C}$  NMR spectrum of compound 4m (100.6 MHz,  $\text{DMSO-}d_6$ ).

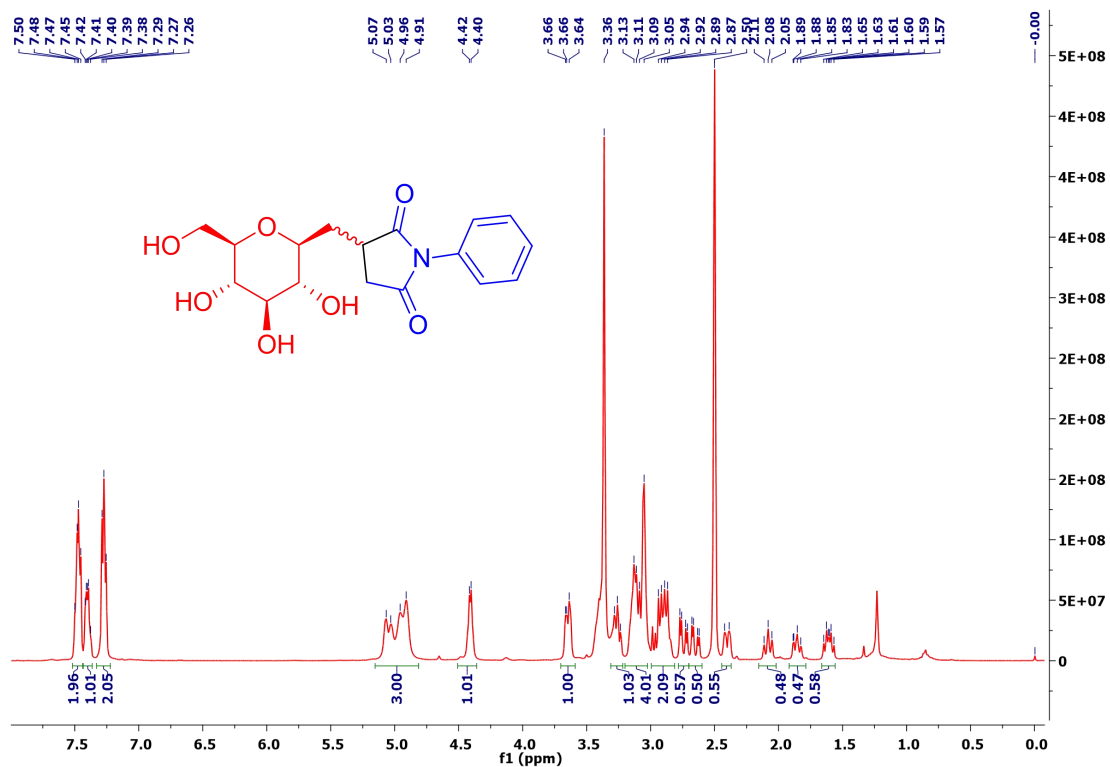

Figure S54.  $^1\text{H}$  NMR spectrum of compound **5a** (400 MHz,  $\text{DMSO-}d_6$ ).

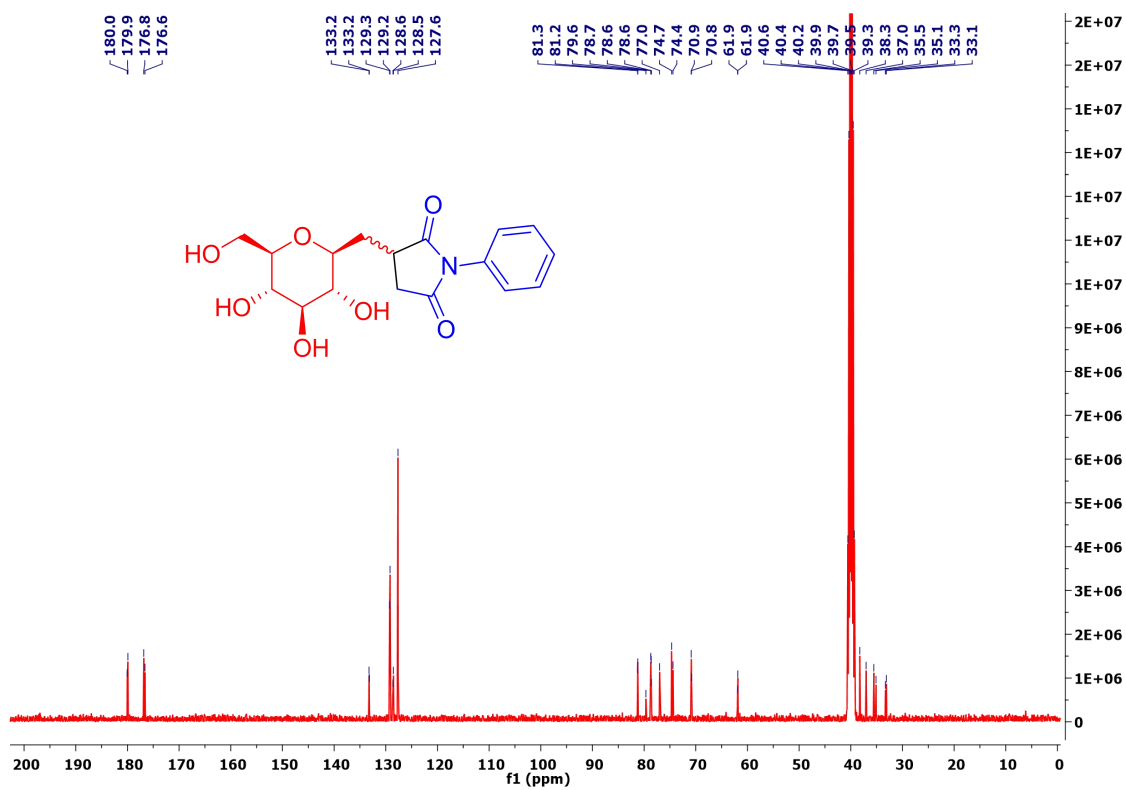

Figure S55.  $^{13}\text{C}$  NMR spectrum of compound **5a** (100.6 MHz,  $\text{DMSO-}d_6$ ).

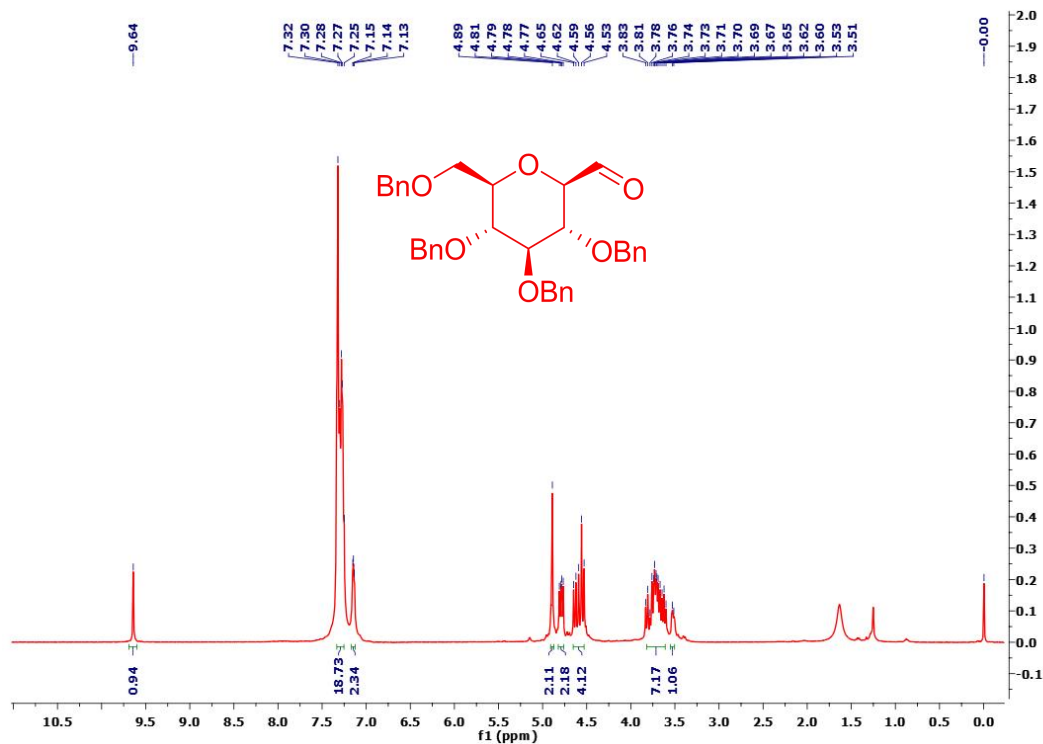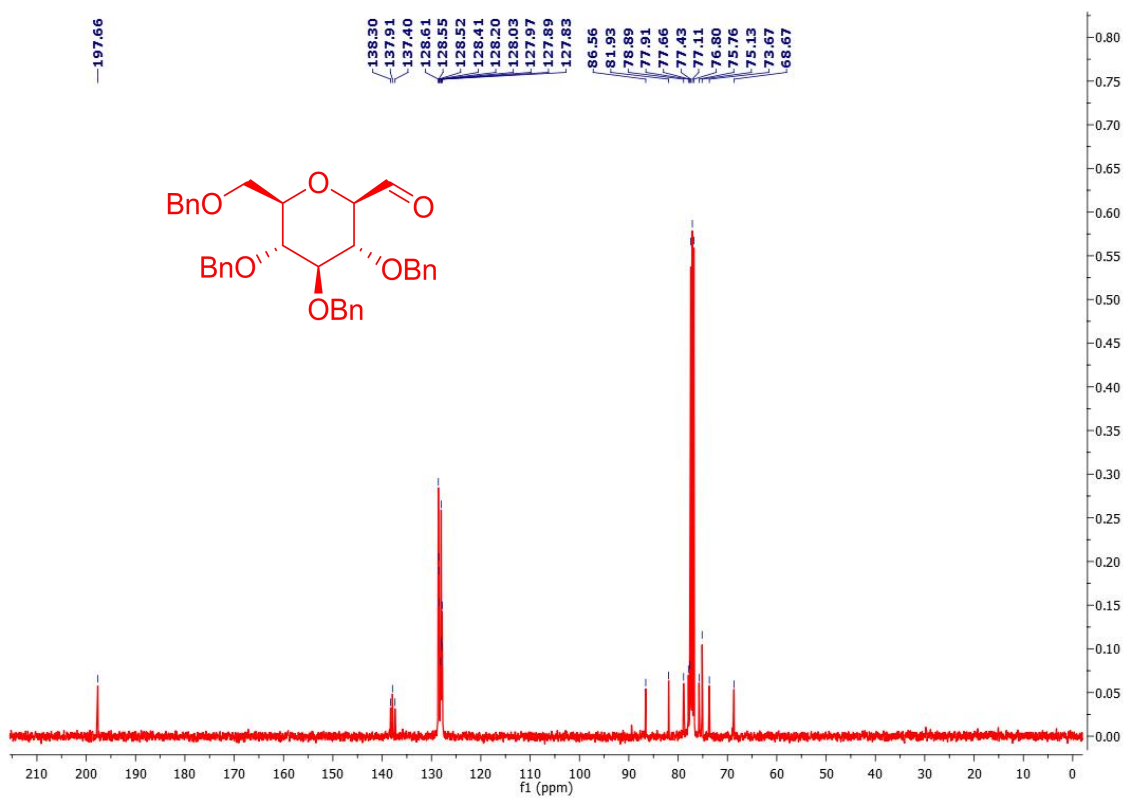

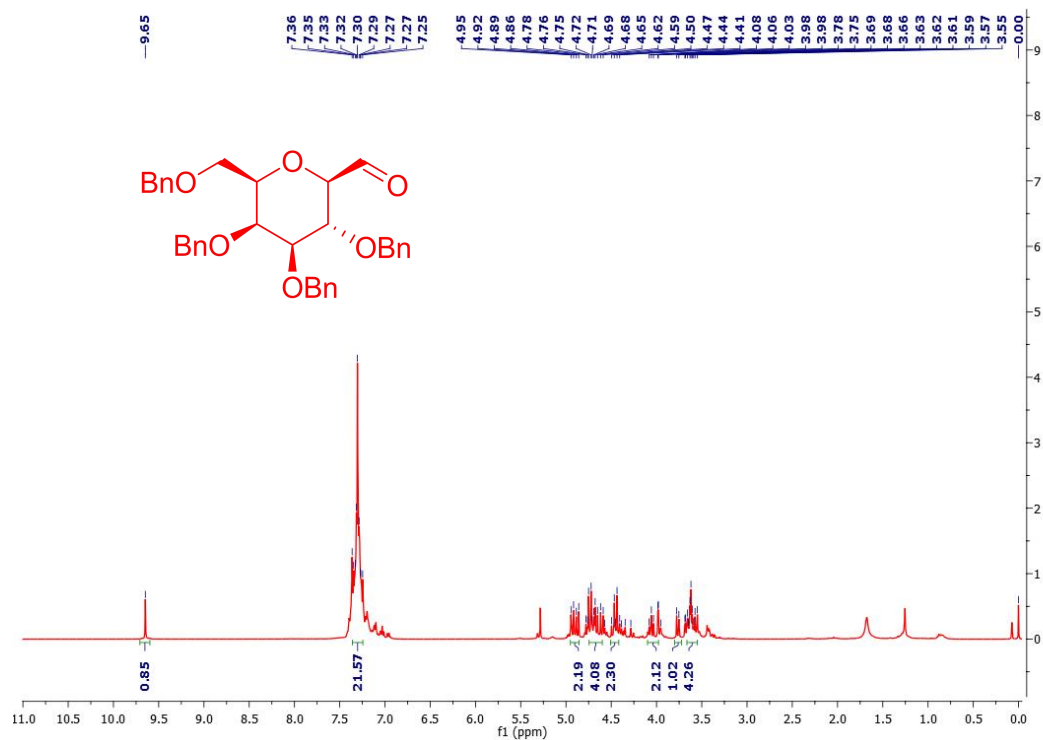

**Figure S58.**  $^1\text{H}$  NMR spectrum of compound **1b** (400 MHz,  $\text{CDCl}_3$ ).

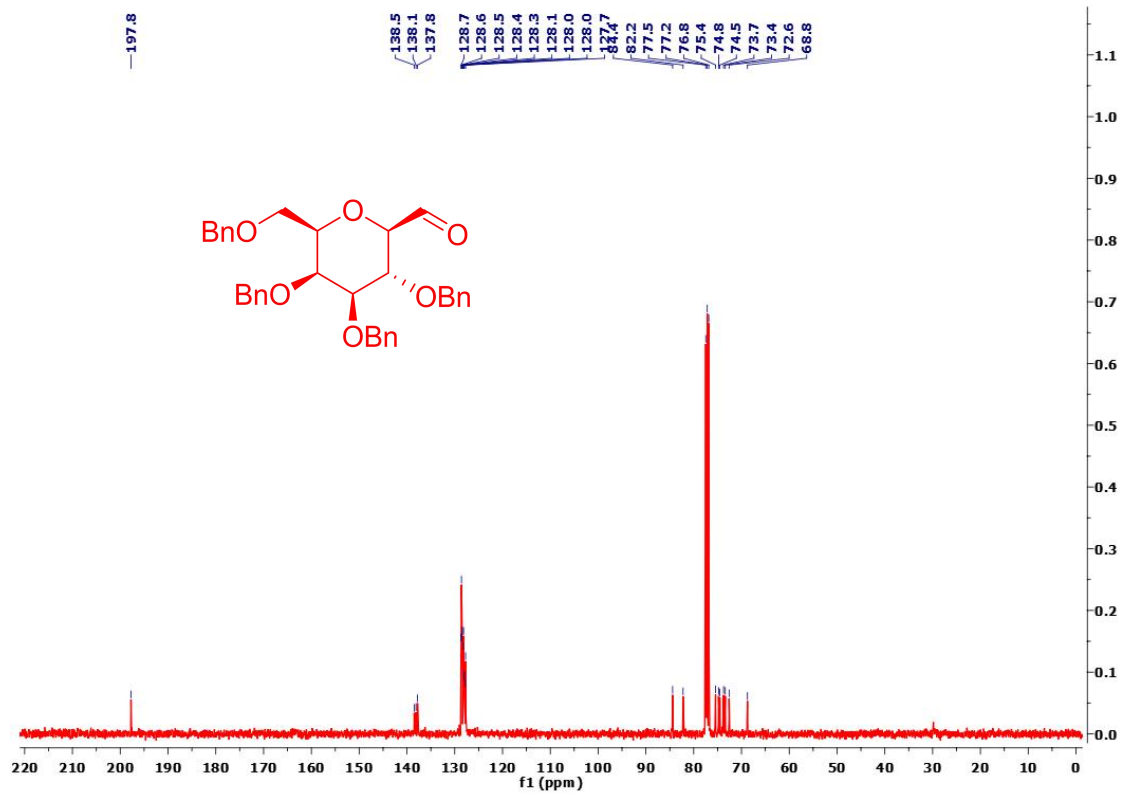

**Figure S59.**  $^{13}\text{C}$  NMR spectrum of compound **1b** (100.6 MHz,  $\text{CDCl}_3$ ).

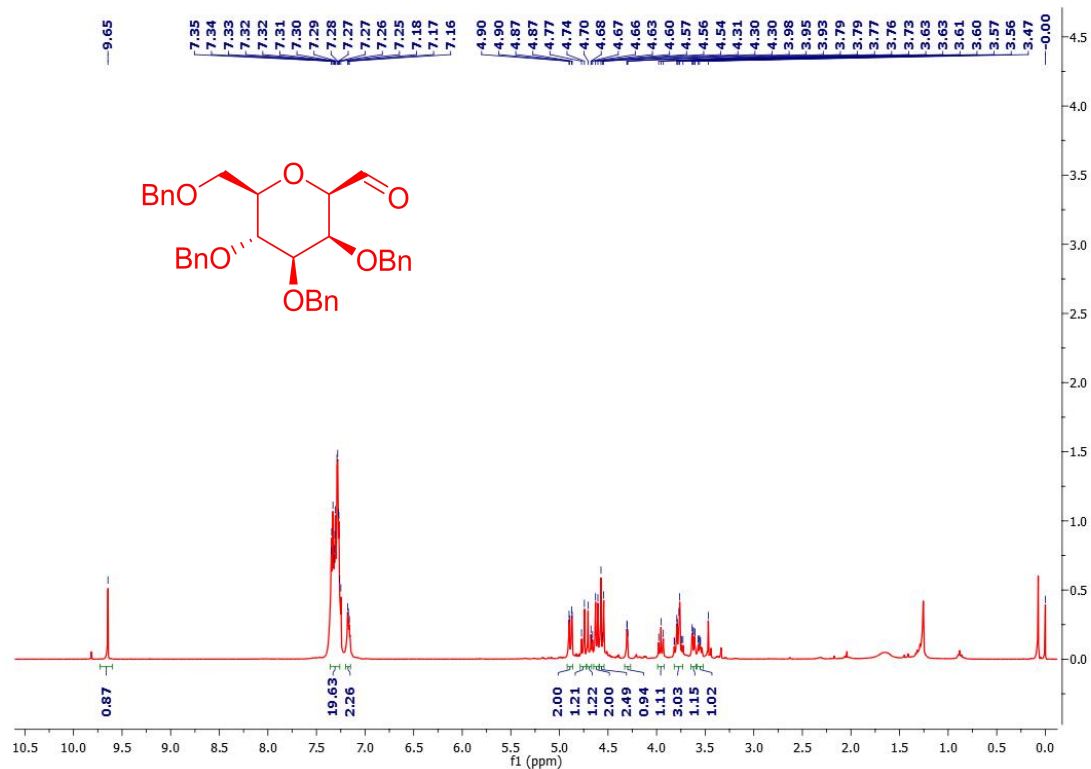

Figure S60. <sup>1</sup>H NMR spectrum of compound 1c (400 MHz, CDCl<sub>3</sub>).

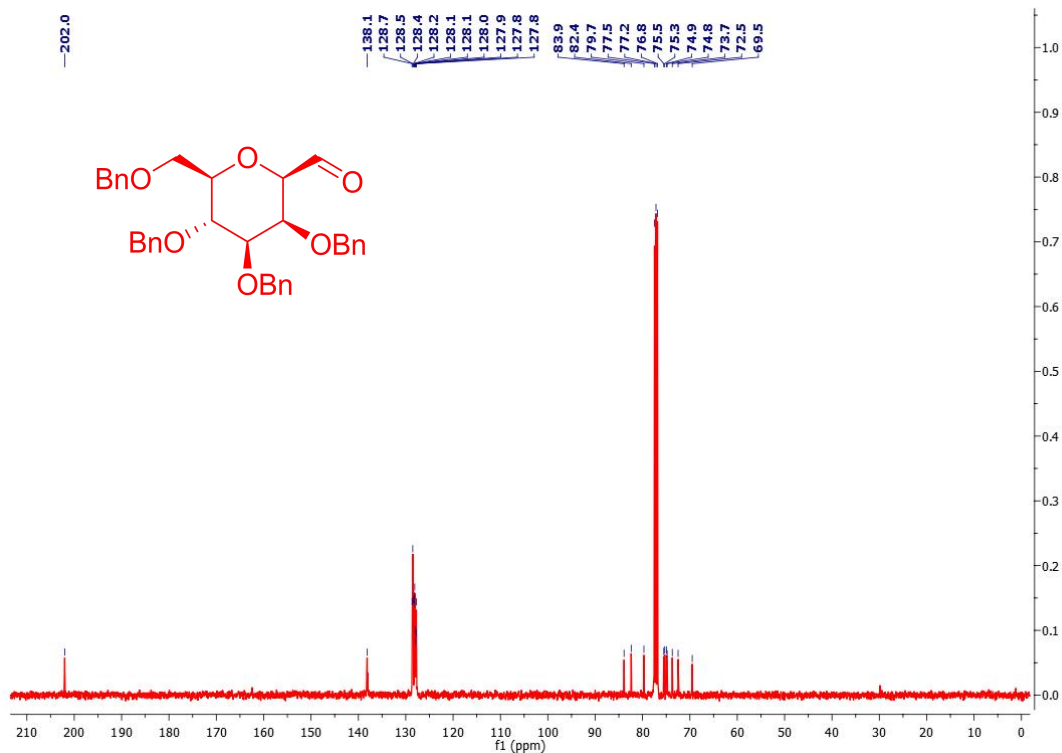

Figure S61. <sup>13</sup>C NMR spectrum of compound 1c (100.6 MHz, CDCl<sub>3</sub>).

### Single crystal X-ray diffraction analysis of (*E*)-3-(*C*-Galactosylmethylidene)-*N*-phenyl succinimide (4k)

Compound **4k** was dissolved in a mixture of ethyl alcohol and water (1:1) to grow single crystals appropriate for X-ray diffraction studies by allowing slow evaporation of the solvent at room temperature. The X-ray diffraction data was collected on X'calibur CCD diffractometer with graphite monochromatized Mo/K $\alpha$  radiation ( $\lambda = 0.71073 \text{ \AA}$ ) at temperature 273 K. The structure was solved and all necessary calculations were carried out using the OLEX2 package of the crystallographic programs.<sup>1</sup> For drawing the molecular graphics, the program Mercury<sup>2</sup> was used. The selected bond lengths, bond angles, *etc.* are given in Table S1.

**Table S1. Crystal data and structure refinement for compound 4k.**

|                                                |                                                                                  |
|------------------------------------------------|----------------------------------------------------------------------------------|
| Identification code                            | <b>4k</b>                                                                        |
| Empirical formula                              | C <sub>34</sub> H <sub>38</sub> N <sub>2</sub> O <sub>14</sub> .H <sub>2</sub> O |
| Formula weight                                 | 732.68                                                                           |
| Temperature/K                                  | 273                                                                              |
| Crystal system                                 | monoclinic                                                                       |
| Space group                                    | C 2                                                                              |
| a/ $\text{\AA}$                                | 46.814 (6)                                                                       |
| b/ $\text{\AA}$                                | 5.8604 (8)                                                                       |
| c/ $\text{\AA}$                                | 12.4797 (16)                                                                     |
| $\alpha$ / $^\circ$                            | 90                                                                               |
| $\beta$ / $^\circ$                             | 105.085 (7)                                                                      |
| $\gamma$ / $^\circ$                            | 90                                                                               |
| Volume/ $\text{\AA}^3$                         | 3305.8 (8)                                                                       |
| Z                                              | 4                                                                                |
| $\rho_{\text{calc}}/\text{g/cm}^3$             | 1.472                                                                            |
| $\mu/\text{mm}^{-1}$                           | 0.118                                                                            |
| F(000)                                         | 1544.0                                                                           |
| Radiation                                      | Mo/K $\alpha$ ( $\lambda = 0.71073$ )                                            |
| 2 $\Theta$ range for data collection/ $^\circ$ | 3.330 to 29.389                                                                  |
| Index ranges                                   | $-10 \leq h \leq 10$ , $-10 \leq k \leq 10$ , $-20 \leq l \leq 20$               |
| Reflections collected                          | 6262                                                                             |
| Independent reflections                        | 9342 [ $R_{\text{int}} = 0.0200$ , $R_{\text{sigma}} = 0.0391$ ]                 |
| Goodness-of-fit on F <sup>2</sup>              | 1.057                                                                            |

|                                                |                 |
|------------------------------------------------|-----------------|
| Final R indexes [ $I \geq 2\sigma(I)$ ]        | $R_1 = 0.0407,$ |
| Final R indexes [all data]                     | $wR_2 = 0.0990$ |
| Largest diff. peak/hole / $e \text{ \AA}^{-3}$ | 0.358/-0.285    |
| Flack parameter                                | 0.1(1)          |
| <b>CCDC No.</b>                                | <b>2109526</b>  |

---

***In-silico* Molecular Docking Study:**

**Table S2: Binding energy of interactions of different ligands with amino acid residues of HPV16 E6 protein**

| S.No. | Ligand | No. of conformations |      | Conformations |      |      |      |     |      |      |     |    |     | AA-interaction                                                               | H-BOND    |
|-------|--------|----------------------|------|---------------|------|------|------|-----|------|------|-----|----|-----|------------------------------------------------------------------------------|-----------|
|       |        |                      |      | 1             | 2    | 3    | 4    | 5   | 6    | 7    | 8   | 9  | 10  |                                                                              |           |
| 1     | 3a     | 6                    | B.E. | -3.6          | -3.3 | -3.1 | -2.9 | -2  | -0.7 |      |     |    |     | R17, K18, F20, Q21, D56, D105, L107,                                         |           |
|       |        |                      | I.C. | 2.2           | 3.8  | 4.6  | 6.5  | 21  | 270  |      |     |    |     |                                                                              |           |
| 2     | 3b     | 10                   | B.E. | -5.4          | -3.4 | -2.7 | -2.1 | -2  | -1.3 | -1.1 | 0   | 0  | 5.6 | R17, K18, V38, Y39, F52, D56, V60, R62, A68, V69, L74, S81, L107, R109, R138 |           |
|       |        |                      | I.C. | 108           | 3.2  | 10.1 | 25.2 | 45  | 99.9 | 142  | 933 | ## | 2.2 |                                                                              |           |
| 3     | 3c     | 2                    | B.E. | -757          | -3.5 |      |      |     |      |      |     |    |     | F20, A53, L107, F116,                                                        |           |
|       |        |                      | I.C. | 0             | 2.7  |      |      |     |      |      |     |    |     |                                                                              |           |
| 4     | 3d     | 4                    | B.E. | -3.4          | -2.3 | -1.2 | -1.1 |     |      |      |     |    |     | R15, R17, C58, V60, S81, Q114, I135, R138                                    |           |
|       |        |                      | I.C. | 3.1           | 20.1 | 122  | 149  |     |      |      |     |    |     |                                                                              |           |
| 5     | 3e     | 10                   | B.E. | -5.49         | -4.8 | -4.4 | -4.3 | -4  | -4.2 | -3.9 | -4  | -4 | -3  | Y39, F52, L57, C58, V60, V69, S81, Q114, I135, R138                          | R17,138   |
|       |        |                      | I.C. | 94.2          | 322  | 577  | 707  | 826 | 861  | 1.46 | 1.6 | 3  | 3.6 |                                                                              |           |
| 6     | 3f     | 1                    | B.E. | -3.11         |      |      |      |     |      |      |     |    |     | F54, D56, D105, L106, L107, P119,                                            | NA        |
|       |        |                      | I.C. | 5.28          |      |      |      |     |      |      |     |    |     |                                                                              |           |
| 7     | 3g     | 8                    | B.E. | -4.27         | -2.7 | -760 | 4.4  | ### | 0.94 | -788 | 2.1 |    |     | R15, R17, K18, V38, F52, D56, C58, V60, Y61, R62, D63, V69, L107, R138       | R62       |
|       |        |                      | I.C. | 741           | 10.4 | 0    | 0    | 0   | 0    | 0    | 0   |    |     |                                                                              |           |
| 8     | 3h     | 4                    | B.E. | -4.5          | -2.7 | -1.2 | -0.3 |     |      |      |     |    |     | R15, K18, C58, V60, L107, R109, Q114, R138                                   |           |
|       |        |                      | I.C. | 475           | 9.9  | 124  | 516  |     |      |      |     |    |     |                                                                              |           |
| 9     | 3i     | 1                    | B.E. | -81           | -114 |      |      |     |      |      |     |    |     | Y88, Q98, Y99, N134, G137, R138, W139,                                       | Y99, T140 |
|       |        |                      | I.C. | 0             | 0    |      |      |     |      |      |     |    |     |                                                                              |           |
| 10    | 3j     | 3                    | B.E. | -2.96         | -1.3 | 0    |      |     |      |      |     |    |     | F54, K115, P116, L117, K122,                                                 | K115      |
|       |        |                      | I.C. | 6.82          | 112  | 868  |      |     |      |      |     |    |     |                                                                              |           |
| 11    | 3k     | 1                    | B.E. | -1.37         |      |      |      |     |      |      |     |    |     | R17, K18, D56, L57, C58, L107, R138                                          |           |
|       |        |                      | I.C. | 99.3          |      |      |      |     |      |      |     |    |     |                                                                              |           |
| 12    | 4a     | 10                   | B.E. | -5            | -4.6 | -4.4 | -4.2 | -4  | -4   | -4   | -3  | -4 | -4  | Y39, L57, V69, Y77, I80, H85                                                 |           |



|    |                    |           |             |              |           |             |             |            |            |             |            |           |            |                                                               |                  |
|----|--------------------|-----------|-------------|--------------|-----------|-------------|-------------|------------|------------|-------------|------------|-----------|------------|---------------------------------------------------------------|------------------|
|    |                    |           | I.C.        | 212          | 415       | 583         | 824         | 1          | 1.1        | 1.13        | 1.9        | 2         | 2.3        |                                                               |                  |
| 13 | <b>4b</b>          | 10        | B.E.        | -107         | -106      | -5          | -4.2        | -4         | -3.8       | -3.5        | -3         | -3        | -3         | P76, Y77, S78, K79, I80, S81, E82, Y83, Y86, I111, Q114, I135 | S81              |
|    |                    |           | I.C.        | 1            | 0         | 201         | 769         | 945        | 1.52       | 2.6         | 2.9        | -3        | 3.6        |                                                               |                  |
| 14 | <b>4c</b>          | 10        | B.E.        | -4           | -3.9      | -3.9        | -3.8        | -4         | -3.5       | -3.3        | -3         | -3        | -3         | C58, V60, L74, Y77, I80, S81,                                 | C58              |
|    |                    |           | I.C.        | 1            | 1.2       | 1.37        | 1.4         | 1.8        | 2.6        | 3.6         | 3.7        | 4         | 6.4        |                                                               |                  |
| 15 | <b>4d</b>          | 10        | B.E.        | -4.8         | -3.9      | -3.8        | -3.8        | -4         | -3.6       | -3.5        | -3         | -3        | -3         | P54, C104, K115, P116, P119, K122                             |                  |
|    |                    |           | I.C.        | 304          | 1.24      | 1.5         | 1.5         | 2.1        | 2.1        | 2.6         | 2.8        | 3         | 5          |                                                               |                  |
| 16 | <b>4e</b>          | 10        | B.E.        | -4.11        |           |             |             |            |            |             |            |           |            | P20, A53, F54, K115, C118                                     | K115             |
|    |                    |           | I.C.        | 972          |           |             |             |            |            |             |            |           |            |                                                               |                  |
| 17 | <b>4f</b>          | 10        | B.E.        | -4.6         | -4.1      | -3.6        |             |            |            |             |            |           |            | Y39, C58, L74, Y77, S81                                       | C58              |
|    |                    |           | I.C.        | 425          | 987       | 2.13        |             |            |            |             |            |           |            |                                                               |                  |
| 18 | <b>4g</b>          | 10        | B.E.        | -2.76        | -3.2      | -3.4        | -4.4        | -4         | -4         | -2.5        | -4         | -3        | -3         | L107, R138, W139,                                             | R138,W139        |
|    |                    |           | I.C.        | 9.48         | 4.27      | 3.39        | 601         | 2.6        | 1.11       | 14.8        | 999        | 12        | 3.1        |                                                               |                  |
| 19 | <b>4h</b>          | 10        | B.E.        | -859         | -839      | -823        | -816        | -5         | -4.3       | -4.1        | -4         | -4        | -3         | I30, A53, F54, L106, P116, L117, K112                         |                  |
|    |                    |           | I.C.        | 0            | 0         | 0           | 0           | 348        | 644        | 918         | 985        | 2         | 4.8        |                                                               |                  |
| 20 | <b>4i</b>          | <b>10</b> | <b>B.E.</b> | <b>-6.02</b> | <b>-6</b> | <b>-5.9</b> | <b>5.7</b>  | <b>-5</b>  | <b>-5</b>  | <b>-4.8</b> | <b>-5</b>  | <b>-5</b> | <b>-5</b>  | <b>P20, D56, L107, I108, P116, K122</b>                       | <b>I108,K122</b> |
|    |                    |           | <b>I.C.</b> | <b>38.9</b>  | <b>40</b> | <b>49</b>   | <b>66.5</b> | <b>104</b> | <b>202</b> | <b>312</b>  | <b>322</b> | <b>##</b> | <b>446</b> |                                                               |                  |
| 21 | <b>4j</b>          | 2         | B.E.        | -3.19        | -2.8      |             |             |            |            |             |            |           |            | D56, R115, P116, L117                                         |                  |
|    |                    |           | I.C.        | 4.59         | 8.79      |             |             |            |            |             |            |           |            |                                                               |                  |
| 22 | <b>4k</b>          | 10        | B.E.        | -4.8         | -4.5      | -4.5        | -4.1        | -4         | -3.9       | -3.9        | -4         | -4        | -3         | Y39, L57, L74, Y77, S78, I80, S81, Q114                       |                  |
|    |                    |           | I.C.        | 287          | 433       | 471         | 862         | 1          | 1.1        | 1.3         | 1.5        | 2         | 6.6        |                                                               |                  |
| 23 | <b>4l</b>          | 10        | B.E.        | -4.1         | -4.1      | -3.9        | -3.8        | -4         | -3.5       | -3.1        | -3         | -3        | -3         | A53, F54, D56, K115, C118                                     | K115             |
|    |                    |           | I.C.        | 911          | 920       | 1.2         | 1.4         | 1.6        | 2.4        | 5.1         | 5.4        | 7         | 11         |                                                               |                  |
| 24 | <b>4m</b>          | 10        | B.E.        | -5.3         | -4.8      | -4.7        | -4.4        | -4         | -4.3       | -4.2        | -4         | -4        | -4         | F54, C104, L106, L107, I108, F116, L117, K112,                | I108             |
|    |                    |           | I.C.        | 130          | 300       | 325         | 574         | 643        | 679        | 765         | 881        | 1         | 1.6        |                                                               |                  |
| 25 | <b>5-FU</b>        | 10        | B.E.        | -3.89        | -3.9      | -3.9        | -3.9        | -4         | -3.3       | -3.3        | -3         | -3        | -3         | L106, L107, G137, R138                                        | L107, L139       |
|    | (Positive Control) |           | I.C.        | 1.42         | 1.41      | 1.44        | 1.51        | 1.9        | 3.54       | 3.7         | 3.7        | 4         | 3.8        |                                                               |                  |

## References

---

1. Dolomanov, O. V.; Bourhis, L. J.; Gildea, R. J.; Howard J. A. K.; Puschmann, H. *OLEX2: a complete structure solution, refinement and analysis program. J. Appl. Crystallogr.* **2009**, *42*, 339-341.
2. Macrae, C. F.; Edgington, P. R.; McCabe, P.; Pidcock, E.; Shields, G. P.; Taylor, R.; Towler, M.; van de Steek, J. *Mercury: visualization and analysis of crystal structures. J. Appl. Crystallogr.* **2006**, *39*, 453-457.
